# Supplementary material for: Supervised mutational signatures for obesity and other tissue-specific etiological factors in cancer
Source: eLife. 2021 Jan 25;10:e61082. doi: 10.7554/eLife.61082 (PMC7872524; doi:10.7554/eLife.61082)
Supplement: Supplementary file 1. — The AUCs and correlations, both apparent and cross-validated, are reported for age and all other etiological factors across all tissue types for each one of the mutational signature methodologies considered in this study: Logistic Regression (Logit), Linear Discriminant Analysis (LDA), Non-negative Least Square Logit using the Betas (NNLS_Logit_betas), Non-negative Least Square Logit using the means (NNLS_Logit_means), Random Forest (RF), Unsupervised as in Alexandrov et al., 2013a (Unsupervised), Best_NMF, Matched_NMF, Signature one as in Alexandrov et al., 2013b (Signature1), and Single Peak (SinglePeak). For their detailed description see the Materials and methods. [file elife-61082-supp1.xlsx]

## Sheet: Age Apparent
type	tissue	factor	Best_NMF	LDA	Logit	Matched_NMF	NNLS_Logit_betas	NNLS_Logit_means	RF	Signature1	SinglePeak	Unsupervised	n
Apparent	ACC	Age	0.616522	0.787826	0.787826	NA	0.787826	0.787826	0.841739	0.471304	0.74	NA	48
Apparent	BLCA	Age	0.638605	0.732781	0.733631	0.491709	0.733631	0.676233	0.800808	0.654337	0.624787	0.654337	97
Apparent	BRCA	Age	0.620643	0.611665	0.611665	0.575162	0.611665	0.611665	0.611724	0.55519	0.568081	0.604666	412
Apparent	CESC	Age	0.698191	0.76124	0.775194	0.698191	0.775194	0.728682	0.773643	0.568734	0.614729	0.568734	88
Apparent	CHOL	Age	0.526627	0.792899	0.792899	NA	0.792899	0.751479	0.772189	0.553254	0.627219	NA	26
Apparent	COAD	Age	0.6423	0.69641	0.69693	0.6423	0.69693	0.675078	0.740114	0.590531	0.684053	0.590531	124
Apparent	ESCAD	Age	0.620499	0.67036	0.67036	0.501385	0.67036	0.634349	0.721607	0.573407	0.51662	0.573407	38
Apparent	ESCSQ	Age	0.595442	0.619658	0.619658	0.595442	0.619658	0.619658	0.645299	0.575499	0.487179	0.575499	53
Apparent	GBM	Age	0.677778	0.714418	0.714683	0.627778	0.714683	0.71045	0.755159	0.612302	0.682672	0.612302	123
Apparent	HNSCC	Age	0.723812	0.806057	0.804112	0.614337	0.804112	0.745207	0.829119	0.671159	0.745763	0.671159	120
Apparent	KICH	Age	0.82526	0.865052	0.865052	0.541522	0.865052	0.844291	0.903114	0.709343	0.858131	0.761246	34
Apparent	KIRC	Age	0.662871	0.827331	0.827066	0.575477	0.827066	0.761653	0.788268	0.551112	0.771716	0.724311	123
Apparent	KIRP	Age	0.695157	0.762108	0.769231	0.695157	0.769231	0.749288	0.797009	0.494302	0.717949	0.705128	53
Apparent	LAML	Age	0.706597	0.695312	0.698785	0.706597	0.698785	0.664062	0.765625	0.585069	0.615451	0.635417	48
Apparent	LGG	Age	0.759259	0.87037	0.87037	0.85	0.87037	0.896296	0.951852	0.792593	0.877778	0.944444	33
Apparent	LIHC	Age	0.62069	0.759236	0.756773	0.564655	0.756773	0.74569	0.791872	0.549261	0.674261	0.674877	57
Apparent	LUAD	Age	0.604938	0.643519	0.679012	0.564815	0.679012	0.640432	0.75463	0.45679	0.574074	0.45679	37
Apparent	OV	Age	0.525981	0.731707	0.731707	0.513786	0.731707	0.720042	0.738865	0.671792	0.540032	0.671792	87
Apparent	PAAD	Age	0.717544	0.691228	0.701754	0.717544	0.701754	0.698246	0.708772	0.638596	0.533333	0.638596	35
Apparent	PCPG	Age	0.704294	0.777849	0.775298	0.742772	0.775298	0.750213	0.785714	0.523384	0.778274	0.753401	97
Apparent	PRAD	Age	0.606925	0.672043	0.677505	0.606925	0.677505	0.663355	0.683699	0.560452	0.691785	0.608925	305
Apparent	SARC	Age	0.749189	0.820656	0.820746	0.798486	0.820746	0.77172	0.829488	0.692682	0.79398	0.805876	149
Apparent	SKCM	Age	0.628792	0.621356	0.621356	0.628792	0.621356	0.621356	0.700773	0.483046	0.533908	0.483046	82
Apparent	STAD	Age	0.641344	0.690052	0.68876	0.641344	0.689664	0.654522	0.71124	0.612726	0.604974	0.612726	176
Apparent	TGCT	Age	0.692763	0.601645	0.601645	0.601974	0.601645	0.601645	0.661513	0.432895	0.6	0.613158	78
Apparent	THCA	Age	0.66499	0.761152	0.762464	0.66499	0.762464	0.759937	0.773931	0.518149	0.745311	0.774514	287
Apparent	THYM	Age	0.727651	0.768538	0.768538	0.684685	0.768538	0.739432	0.7772	0.595981	0.710672	0.718642	76
Apparent	UCEC	Age	0.727273	0.760331	0.818182	0.504132	0.81405	0.735537	0.768595	0.661157	0.578512	0.561983	22
Apparent	UCS	Age	0.598039	0.622549	0.622549	NA	0.622549	0.622549	0.735294	0.633987	0.609477	NA	35
Apparent	UVM	Age	0.735	0.69375	0.69375	NA	0.69375	0.69375	0.70125	0.29	0.58625	NA	40
Apparent	Median	Age	0.663931	0.732244	0.732669	0.621058	0.732669	0.715246	0.76711	0.574453	0.626003	0.637007	NA
Apparent	Subset median	Age	0.671384	0.732244	0.732669	0.621058	0.732669	0.715246	0.76711	0.580284	0.649524	0.637007	NA
Apparent	Overall median	Age	0.663931	0.732244	0.732669	0.604449	0.732669	0.715246	0.76711	0.574453	0.626003	0.612942	NA
The "Subset median" AUC is the median AUC calculated only over the tissues where Alexandrov et al. found an age signature.
To calculate the "Overall median" AUC, whenever Alexandrov et al. methodology was not able to detect the age signature in a tissue, and therefore its intensities were not provided (NA), a 0.5 AUC was assigned to that signature for that tissue for their methodology.

## Sheet: Other Exposures Apparent
type	tissue	factor	Best_NMF	LDA	Logit	Matched_NMF	NNLS_Logit_betas	NNLS_Logit_means	RF	Signature1	SinglePeak	Unsupervised	n
Apparent	ESCA	Alcohol	0.68287	0.833333	0.842593	NA	0.611111	0.5	0.907407	NA	NA	NA	30
Apparent	HNSCC	Alcohol	0.589862	0.25576	0.74424	NA	0.5	0.5	0.756912	NA	NA	NA	45
Apparent	LIHC	Alcohol	0.604683	0.651946	0.665031	NA	0.665031	0.656594	0.719525	NA	NA	NA	154
Apparent	BLCA	Aristolochic Acid	0.940557	0.993498	0.993498	0.940557	0.993498	0.993498	0.997833	NA	NA	0.964396	104
Apparent	MESO	Asbestos	0.9375	0.985227	0.993182	NA	0.993182	0.988636	0.992045	NA	NA	NA	62
Apparent	BRCA	BRCA1/2 Mutation	0.755708	0.83832	0.842018	0.755708	0.842018	0.818387	0.89436	NA	NA	0.670274	727
Apparent	OV	BRCA1/2 Mutation	0.812738	0.882151	0.881007	0.663616	0.881007	0.784134	0.884058	NA	NA	0.809687	157
Apparent	LIHC	Hepatitis B	0.589091	0.680909	0.681364	NA	0.681364	0.682121	0.717197	NA	NA	NA	163
Apparent	LIHC	Hepatitis C	0.654326	0.72654	0.726173	NA	0.726173	0.704912	0.816716	NA	NA	NA	119
Apparent	CESC	High Apobec	0.67089	0.653092	0.662745	0.627451	0.663348	0.639216	0.706184	NA	NA	0.638612	116
Apparent	KIRC	High Apobec	0.625963	0.651975	0.652457	NA	0.652457	0.651734	0.727722	NA	NA	NA	197
Apparent	GBM	IDH Methylated	0.719957	0.73015	0.723712	NA	0.717141	0.502146	0.861454	NA	NA	NA	249
Apparent	LGG	IDH Methylated	0.785621	0.73585	0.733919	NA	0.733919	0.641241	0.76077	NA	NA	NA	446
Apparent	GBM	MGMT Methylated	0.660787	0.764601	0.764601	NA	0.764601	0.764601	0.782548	NA	NA	NA	232
Apparent	LGG	MGMT Methylated	0.695887	0.748918	0.756494	NA	0.756494	0.768398	0.815206	NA	NA	NA	89
Apparent	COAD	MSI	0.985375	0.987464	0.987464	0.985375	0.987464	0.987464	0.981387	NA	NA	0.967047	222
Apparent	STAD	MSI	0.95638	1	1	0.998481	1	1	1	NA	NA	0.999855	336
Apparent	UCEC	MSI	0.941138	0.999008	0.999008	0.975694	0.999008	0.999008	0.999339	NA	NA	1	120
Apparent	COAD	Obesity	0.601993	0.586249	0.586249	NA	0.586249	0.586249	0.606366	NA	NA	NA	249
Apparent	ESCA	Obesity	0.684729	0.706281	0.709975	NA	0.709975	0.711207	0.844212	NA	NA	NA	57
Apparent	KIRP	Obesity	0.745161	0.748387	0.795968	NA	0.795968	0.808871	0.868548	NA	NA	NA	71
Apparent	UCEC	Obesity	0.614566	0.34271	0.65729	NA	0.5	0.5	0.673576	NA	NA	NA	233
Apparent	STAD	POLD Mutation	0.969017	1	1	NA	1	1	1	NA	NA	NA	301
Apparent	UCEC	POLD Mutation	0.902778	0.998016	0.998016	NA	0.998016	0.998016	0.998016	NA	NA	NA	50
Apparent	BRCA	POLe Mutation	0.67068	0.674195	0.679105	0.588581	0.679105	0.679105	0.785106	NA	NA	0.423295	719
Apparent	COAD	POLe Mutation	0.926923	1	1	0.649679	1	1	1	NA	NA	0.722756	211
Apparent	STAD	POLe Mutation	0.955409	0.999264	0.999264	NA	0.999264	0.999264	0.999632	NA	NA	NA	307
Apparent	UCEC	POLe Mutation	0.896825	1	1	0.752381	1	1	1	NA	NA	0.734127	71
Apparent	BLCA	Smoking	0.629528	0.714402	0.71417	0.629528	0.71417	0.69151	0.750623	NA	0.64022	0.683918	288
Apparent	CESC	Smoking	0.561679	0.427007	0.572993	NA	0.5	0.5	0.597628	NA	0.428102	NA	217
Apparent	ESCAD	Smoking	0.640373	0.655901	0.654658	NA	0.654658	0.640994	0.713665	NA	0.582609	NA	58
Apparent	ESCSQ	Smoking	0.586858	0.597593	0.597593	0.394275	0.597593	0.597593	0.676643	NA	0.52635	0.470072	82
Apparent	HNSCC	Smoking	0.758802	0.811612	0.826833	0.677487	0.826833	0.803416	0.835635	NA	0.695333	0.818213	354
Apparent	KIRP	Smoking	0.627976	0.728423	0.734375	0.519345	0.734375	0.681548	0.779762	NA	0.608259	0.625744	100
Apparent	LUAD	Smoking	0.872403	0.918317	0.924417	0.88368	0.924417	0.9187	0.930781	NA	0.90981	0.910619	375
Apparent	PAAD	Smoking	0.607211	0.593928	0.593928	NA	0.593928	0.593928	0.63599	NA	0.548545	NA	113
Apparent	SKCM	UV	0.939423	0.975556	1	0.921678	1	0.983081	0.965051	NA	NA	0.949633	374
Apparent	Median	NA	0.695887	0.748387	0.756494	0.714934	0.734375	0.711207	0.835635	NA	0.595434	0.771907	NA
Apparent	Subset median	NA	0.84257	0.900234	0.902712	0.714934	0.902712	0.868543	0.912571	NA	NA	0.771907	NA
Apparent	Subset smoking median	Smoking	0.629528	0.728423	0.734375	0.629528	0.734375	0.69151	0.779762	NA	0.64022	0.683918	NA
Apparent	Overall smoking median	Smoking	0.628752	0.685151	0.684414	0.509673	0.597593	0.597593	0.676643	NA	0.548545	0.562872	NA
The "Subset median" AUC is the median AUC calculated only over the tissues where Alexandrov et al. found a signature for the given exposure.
The "Subset smoking median" was instead calculated by restricting the set of tissues to those where Alexandrov et al. detected smoking signatures.
To calculate the "Overall smoking median" AUC, whenever Alexandrov et al. methodology was not able to detect a smoking signature in a tissue, and therefore its intensities were not provided (NA), a 0.5 AUC was assigned for their methodology to the smoking signature for that tissue.

## Sheet: Age Cross-validated
type	tissue	factor	Best_NMF	LDA	Logit	Matched_NMF	NNLS_Logit_betas	NNLS_Logit_means	RF	Signature1	SinglePeak	Unsupervised	n
Cross-validated	ACC	Age	0.5724	0.7384	0.727	NA	0.7262	0.769	0.7606	NA	NA	NA	48
Cross-validated	BLCA	Age	0.587311	0.686822	0.682089	0.524499	0.682089	0.623289	0.716383	NA	NA	NA	97
Cross-validated	BRCA	Age	0.603847	0.594843	0.594843	0.578565	0.594843	0.594843	0.596783	NA	NA	NA	412
Cross-validated	CESC	Age	0.671204	0.710926	0.709074	0.685617	0.709074	0.719383	0.678519	NA	NA	NA	88
Cross-validated	CHOL	Age	0.437778	0.733889	0.733889	NA	0.733889	0.733889	0.702778	NA	NA	NA	26
Cross-validated	COAD	Age	0.585972	0.624933	0.619933	0.639541	0.619933	0.626879	0.633295	NA	NA	NA	124
Cross-validated	ESCAD	Age	0.510417	0.570833	0.560417	0.5575	0.560417	0.527083	0.536667	NA	NA	NA	38
Cross-validated	ESCSQ	Age	0.5184	0.5364	0.5364	0.577333	0.5364	0.5364	0.492267	NA	NA	NA	53
Cross-validated	GBM	Age	0.635801	0.67937	0.667756	0.627618	0.667756	0.689957	0.717051	NA	NA	NA	123
Cross-validated	HNSCC	Age	0.714713	0.74066	0.730014	0.635325	0.730014	0.717069	0.712299	NA	NA	NA	120
Cross-validated	KICH	Age	0.842917	0.778472	0.75125	0.691111	0.75125	0.799028	0.801111	NA	NA	NA	34
Cross-validated	KIRC	Age	0.692374	0.806137	0.805254	0.673247	0.805254	0.757102	0.747554	NA	NA	NA	123
Cross-validated	KIRP	Age	0.749111	0.737089	0.732289	0.734978	0.732289	0.725133	0.736111	NA	NA	NA	53
Cross-validated	LAML	Age	0.5608	0.5152	0.535	0.5648	0.5374	0.5682	0.5108	NA	NA	NA	48
Cross-validated	LGG	Age	0.814444	0.844444	0.85	0.846667	0.85	0.847778	0.857778	NA	NA	NA	33
Cross-validated	LIHC	Age	0.611222	0.707867	0.696733	0.613533	0.696733	0.710067	0.677356	NA	NA	NA	57
Cross-validated	LUAD	Age	0.440139	0.512917	0.484861	0.528194	0.482361	0.519028	0.519722	NA	NA	NA	37
Cross-validated	OV	Age	0.473858	0.712725	0.713639	0.498765	0.713639	0.720096	0.70983	NA	NA	NA	87
Cross-validated	PAAD	Age	0.593333	0.661667	0.649444	0.667778	0.649444	0.678333	0.660556	NA	NA	NA	35
Cross-validated	PCPG	Age	0.679454	0.744798	0.744156	0.734074	0.744156	0.749444	0.7392	NA	NA	NA	97
Cross-validated	PRAD	Age	0.603355	0.649914	0.64772	0.613763	0.64772	0.661226	0.644796	NA	NA	NA	305
Cross-validated	SARC	Age	0.744887	0.805935	0.795668	0.80199	0.795668	0.767262	0.785871	NA	NA	NA	149
Cross-validated	SKCM	Age	0.635872	0.613129	0.613129	0.429583	0.613129	0.613129	0.642141	NA	NA	NA	82
Cross-validated	STAD	Age	0.643489	0.663765	0.660984	0.621794	0.661561	0.644201	0.667113	NA	NA	NA	176
Cross-validated	TGCT	Age	0.638661	0.537098	0.537098	0.607411	0.537098	0.537098	0.534375	NA	NA	NA	78
Cross-validated	THCA	Age	0.681571	0.759718	0.76003	0.681965	0.76003	0.763803	0.771529	NA	NA	NA	287
Cross-validated	THYM	Age	0.721741	0.738048	0.734522	0.668048	0.734522	0.702672	0.753744	NA	NA	NA	76
Cross-validated	UCEC	Age	0.597222	0.717222	0.733889	0.321667	0.733889	0.783889	0.672222	NA	NA	NA	22
Cross-validated	UCS	Age	0.534028	0.393194	0.393194	NA	0.393194	0.393194	0.367361	NA	NA	NA	35
Cross-validated	UVM	Age	0.665	0.70625	0.70625	NA	0.70625	0.70625	0.65625	NA	NA	NA	40
Cross-validated	Median	Age	0.623512	0.707058	0.701492	0.624706	0.701492	0.704461	0.677937	NA	NA	NA	NA
Cross-validated	Subset median	Age	0.635837	0.697344	0.689411	0.624706	0.689411	0.696315	0.677937	NA	NA	NA	NA
Cross-validated	Overall median	Age	0.623512	0.707058	0.701492	0.613648	0.701492	0.704461	0.677937	NA	NA	NA	NA
The "Subset median" AUC is the median AUC calculated only over the tissues where Alexandrov et al. found an age signature.
To calculate the "Overall median" AUC, whenever Alexandrov et al. methodology was not able to detect the age signature in a tissue, and therefore its intensities were not provided (NA), a 0.5 AUC was assigned to that signature for that tissue for their methodology.

## Sheet: Other Exposures Cross-validated
type	tissue	factor	Best_NMF	LDA	Logit	Matched_NMF	NNLS_Logit_betas	NNLS_Logit_means	RF	Signature1	SinglePeak	Unsupervised	n
Cross-validated	ESCA	Alcohol	0.380833	0.464444	0.434444	NA	0.476389	0.480556	0.409167	NA	NA	NA	30
Cross-validated	HNSCC	Alcohol	0.561349	0.437143	0.562857	NA	0.5	0.5	0.56746	NA	NA	NA	45
Cross-validated	LIHC	Alcohol	0.595812	0.606437	0.619069	NA	0.619431	0.609727	0.640841	NA	NA	NA	154
Cross-validated	BLCA	Aristolochic Acid	0.89402	0.962745	0.962745	0.941961	0.962745	0.962745	0.970686	NA	NA	NA	104
Cross-validated	MESO	Asbestos	0.949	0.984	0.956875	NA	0.97925	0.963	0.95875	NA	NA	NA	62
Cross-validated	BRCA	BRCA1/2 Mutation	0.735024	0.808495	0.813761	0.703147	0.813675	0.785259	0.821744	NA	NA	NA	727
Cross-validated	OV	BRCA1/2 Mutation	0.783726	0.751528	0.734923	0.789916	0.734923	0.761523	0.768236	NA	NA	NA	157
Cross-validated	LIHC	Hepatitis B	0.528187	0.58844	0.588126	NA	0.588126	0.583115	0.592292	NA	NA	NA	163
Cross-validated	LIHC	Hepatitis C	0.554533	0.60835	0.604553	NA	0.604553	0.597952	0.646052	NA	NA	NA	119
Cross-validated	CESC	High Apobec	0.597678	0.557105	0.567469	0.615189	0.567273	0.622294	0.588126	NA	NA	NA	116
Cross-validated	KIRC	High Apobec	0.489435	0.508745	0.508866	NA	0.508866	0.525896	0.484061	NA	NA	NA	197
Cross-validated	GBM	IDH Methylated	0.745355	0.599004	0.611759	NA	0.608142	0.500311	0.649785	NA	NA	NA	249
Cross-validated	LGG	IDH Methylated	0.787732	0.720142	0.718189	NA	0.718206	0.595474	0.716001	NA	NA	NA	446
Cross-validated	GBM	MGMT Methylated	0.679912	0.761949	0.761352	NA	0.761352	0.762536	0.755498	NA	NA	NA	232
Cross-validated	LGG	MGMT Methylated	0.735281	0.729372	0.729892	NA	0.729892	0.731277	0.759329	NA	NA	NA	89
Cross-validated	COAD	MSI	0.956923	0.967521	0.980564	0.96412	0.967521	0.967521	0.965333	NA	NA	NA	222
Cross-validated	STAD	MSI	0.973116	0.998634	0.996741	0.99871	0.998634	0.998634	0.987341	NA	NA	NA	336
Cross-validated	UCEC	MSI	0.947371	0.992868	0.982353	0.979808	0.992868	0.992868	0.979695	NA	NA	NA	120
Cross-validated	COAD	Obesity	0.54828	0.523535	0.523535	NA	0.523535	0.523535	0.51983	NA	NA	NA	249
Cross-validated	ESCA	Obesity	0.6198	0.502689	0.478022	NA	0.467511	0.546244	0.614222	NA	NA	NA	57
Cross-validated	KIRP	Obesity	0.734881	0.713393	0.730357	NA	0.730357	0.770238	0.786607	NA	NA	NA	71
Cross-validated	UCEC	Obesity	0.600174	0.399299	0.600701	NA	0.5	0.490063	0.609008	NA	NA	NA	233
Cross-validated	STAD	POLD Mutation	0.98924	0.951053	0.9606	NA	0.951053	0.951053	0.962166	NA	NA	NA	301
Cross-validated	UCEC	POLD Mutation	0.872857	0.996429	0.927619	NA	0.996429	0.996429	0.928214	NA	NA	NA	50
Cross-validated	BRCA	POLe Mutation	0.497527	0.513712	0.51664	0.587089	0.515607	0.531287	0.520224	NA	NA	NA	719
Cross-validated	COAD	POLe Mutation	0.830171	0.999487	0.999487	0.690598	0.999487	0.999487	0.999145	NA	NA	NA	211
Cross-validated	STAD	POLe Mutation	0.932559	0.990708	0.992719	NA	0.990708	0.990708	0.97	NA	NA	NA	307
Cross-validated	UCEC	POLe Mutation	0.84301	0.997551	0.985306	0.735408	0.997551	0.997551	0.983265	NA	NA	NA	71
Cross-validated	BLCA	Smoking	0.656927	0.685363	0.681492	0.658927	0.681492	0.691366	0.701267	NA	NA	NA	288
Cross-validated	CESC	Smoking	0.544752	0.496248	0.488566	NA	0.492407	0.492407	0.50166	NA	NA	NA	217
Cross-validated	ESCAD	Smoking	0.615714	0.506286	0.503143	NA	0.504	0.592286	0.465714	NA	NA	NA	58
Cross-validated	ESCSQ	Smoking	0.477497	0.529915	0.45817	0.5378	0.494042	0.495861	0.45143	NA	NA	NA	82
Cross-validated	HNSCC	Smoking	0.750496	0.798764	0.81479	0.72375	0.81479	0.80233	0.814804	NA	NA	NA	354
Cross-validated	KIRP	Smoking	0.60435	0.561998	0.546716	0.518517	0.565576	0.59	0.567206	NA	NA	NA	100
Cross-validated	LUAD	Smoking	0.855516	0.904306	0.904619	0.890527	0.904619	0.902829	0.899694	NA	NA	NA	375
Cross-validated	PAAD	Smoking	0.573166	0.533626	0.533626	NA	0.533626	0.533626	0.529097	NA	NA	NA	113
Cross-validated	SKCM	UV	0.927523	0.956791	0.946956	0.891578	0.986653	0.975212	0.956432	NA	NA	NA	374
Cross-validated	Median	NA	0.734881	0.713393	0.718189	0.729579	0.718206	0.691366	0.716001	NA	NA	NA	NA
Cross-validated	Subset median	NA	0.806948	0.8564	0.859704	0.729579	0.859704	0.85258	0.860719	NA	NA	NA	NA
Cross-validated	Subset smoking median	Smoking	0.656927	0.685363	0.681492	0.658927	0.681492	0.691366	0.701267	NA	NA	NA	NA
Cross-validated	Overall smoking median	Smoking	0.610032	0.547812	0.540171	0.528159	0.549601	0.591143	0.548151	NA	NA	NA	NA
The "Subset median" AUC is the median AUC calculated only over the tissues where Alexandrov et al. found a signature for the given exposure.
The "Subset smoking median" was instead calculated by restricting the set of tissues to those where Alexandrov et al. detected smoking signatures.
To calculate the "Overall smoking median" AUC, whenever Alexandrov et al. methodology was not able to detect a smoking signature in a tissue, and therefore its intensities were not provided (NA), a 0.5 AUC was assigned for their methodology to the smoking signature for that tissue.

## Sheet: Correlations Apparent
type	tissue	factor	Alex	Best_NMF	LDA	Logit	Matched_NMF	NNLS_Logit_betas	NNLS_Logit_means	RF	n
Apparent	ACC	Age	NA	0.180014	0.400587	0.400587	NA	0.400587	0.402054	0.494092	48
Apparent	BLCA	Age	0.173713	0.27632	0.380927	0.385429	0.106793	0.385429	0.349685	0.504344	97
Apparent	BRCA	Age	0.214659	0.217571	0.207927	0.207927	0.126275	0.207927	0.207927	0.207749	412
Apparent	CESC	Age	0.177166	0.444304	0.448897	0.477316	0.444304	0.477316	0.376444	0.483397	88
Apparent	CHOL	Age	NA	0.201062	0.56761	0.56761	NA	0.56761	0.506941	0.519815	26
Apparent	COAD	Age	0.168612	0.169959	0.256984	0.25847	0.169959	0.25847	0.248666	0.344597	124
Apparent	ESCAD	Age	0.161972	0.229746	0.23348	0.23348	0.0821015	0.23348	0.129199	0.320782	38
Apparent	ESCSQ	Age	0.0942075	0.198389	0.242535	0.242535	0.198389	0.242535	0.242535	0.282356	53
Apparent	GBM	Age	0.193674	0.339779	0.393468	0.3939	0.215721	0.3939	0.383938	0.460224	123
Apparent	HNSCC	Age	0.325883	0.375465	0.504602	0.502031	0.224064	0.502031	0.458705	0.583479	120
Apparent	KICH	Age	0.492162	0.417462	0.572314	0.572314	0.0927436	0.572314	0.606731	0.639194	34
Apparent	KIRC	Age	0.462924	0.368972	0.608482	0.607372	0.133401	0.607372	0.546427	0.568716	123
Apparent	KIRP	Age	0.318716	0.293826	0.422492	0.434646	0.293826	0.434646	0.406704	0.496002	53
Apparent	LAML	Age	0.253906	0.372785	0.37319	0.381991	0.372785	0.381991	0.343814	0.500828	48
Apparent	LGG	Age	0.807429	0.474381	0.653077	0.653077	0.618836	0.653077	0.671494	0.802536	33
Apparent	LIHC	Age	0.301583	0.312306	0.560325	0.553093	0.185347	0.553093	0.557049	0.588961	57
Apparent	LUAD	Age	-0.122528	0.121657	0.158201	0.254111	0.036107	0.254111	0.16211	0.355267	37
Apparent	OV	Age	0.256024	0.0015234	0.36455	0.36455	0.0217734	0.36455	0.342371	0.357721	87
Apparent	PAAD	Age	0.276391	0.426077	0.28311	0.296745	0.426077	0.296745	0.299502	0.319483	35
Apparent	PCPG	Age	0.42159	0.436952	0.46329	0.46248	0.435493	0.46248	0.435582	0.49062	97
Apparent	PRAD	Age	0.241828	0.202869	0.311957	0.31689	0.202869	0.31689	0.31523	0.350112	305
Apparent	SARC	Age	0.553494	0.445706	0.575662	0.57742	0.538971	0.57742	0.491248	0.56897	149
Apparent	SKCM	Age	0.0240021	0.186239	0.154685	0.154685	0.186239	0.154685	0.154685	0.240999	82
Apparent	STAD	Age	0.244364	0.263173	0.349838	0.345629	0.263173	0.34691	0.30927	0.387644	176
Apparent	TGCT	Age	0.200845	0.362003	0.207645	0.207645	0.169911	0.207645	0.207645	0.289665	78
Apparent	THCA	Age	0.454175	0.249167	0.409875	0.413186	0.249167	0.413186	0.421925	0.43861	287
Apparent	THYM	Age	0.471443	0.430522	0.544427	0.544427	0.45353	0.544427	0.48572	0.545388	76
Apparent	UCEC	Age	0.329	0.406319	0.359631	0.580023	-0.0345706	0.579979	0.396648	0.46853	22
Apparent	UCS	Age	NA	0.0902191	0.222058	0.222058	NA	0.222058	0.222058	0.391751	35
Apparent	UVM	Age	NA	0.327518	0.275426	0.275426	NA	0.275426	0.275426	0.286661	40
Apparent	BLCA	Smoking	0.231136	0.00923778	0.312565	0.312739	0.0283663	0.0937483	0.0797306	0.360301	288
Apparent	CESC	Smoking	NA	0.10799	-0.0653875	0.0653875	NA	0	0	0.129196	217
Apparent	ESCAD	Smoking	NA	0.144978	0.233099	0.230399	NA	0.234624	-0.00841798	0.330539	58
Apparent	ESCSQ	Smoking	-0.0147372	0.14498	0.0407969	0.0407969	-0.228614	0.0502864	0.0499304	0.161547	82
Apparent	HNSCC	Smoking	0.52686	0.230891	0.527769	0.569631	0.248484	0.343722	0.319089	0.577632	354
Apparent	KIRP	Smoking	0.117358	0.211595	0.344379	0.353049	0	0.0975572	0.078694	0.409644	100
Apparent	LUAD	Smoking	0.325144	0.217057	0.46929	0.476243	-0.254421	0.347943	0.321999	0.486314	375
Apparent	PAAD	Smoking	NA	0.0682847	0.227367	0.227367	NA	0.166964	-0.012565	0.292589	113
Age median subset			0.254965	0.303066	0.377058	0.389664	0.200629	0.389664	0.363064	0.464377
Smoking median subset			0.231136	0.144979	0.272832	0.271569	0	0.132261	0.0643122	0.34542

## Sheet: Correlations Cross-validated
type	tissue	factor	Alex	Best_NMF	LDA	Logit	Matched_NMF	NNLS_Logit_betas	NNLS_Logit_means	RF	n
Cross-validated	ACC	Age	NA	-0.125	0.31026	0.281866	NA	0.280685	0.354899	0.324579	48
Cross-validated	BLCA	Age	NA	0.0322085	0.327844	0.318324	NA	0.318324	0.251333	0.374983	97
Cross-validated	BRCA	Age	NA	0.01171	0.185227	0.185227	NA	0.185227	0.185227	0.188666	412
Cross-validated	CESC	Age	NA	0.00745469	0.390275	0.387611	NA	0.387611	0.357257	0.3208	88
Cross-validated	CHOL	Age	NA	-0.0816987	0.400785	0.400785	NA	0.400785	0.400785	0.34902	26
Cross-validated	COAD	Age	NA	0.153272	0.148845	0.143755	NA	0.143755	0.1516	0.19153	124
Cross-validated	ESCAD	Age	NA	0.0522166	0.0861723	0.0732377	NA	0.0732377	-0.031828	0.0304648	38
Cross-validated	ESCSQ	Age	NA	-0.273359	0.0842895	0.0842895	NA	0.0842895	0.0842895	0.0284154	53
Cross-validated	GBM	Age	NA	-0.0408366	0.313775	0.299314	NA	0.299314	0.325818	0.393584	123
Cross-validated	HNSCC	Age	NA	0.0678023	0.412197	0.404571	NA	0.404571	0.403962	0.395719	120
Cross-validated	KICH	Age	NA	0.184211	0.470783	0.439439	NA	0.439439	0.52728	0.502352	34
Cross-validated	KIRC	Age	NA	0.280338	0.56804	0.564946	NA	0.564946	0.529667	0.511486	123
Cross-validated	KIRP	Age	NA	-0.1375	0.377122	0.367996	NA	0.367996	0.371028	0.367135	53
Cross-validated	LAML	Age	NA	-0.142001	0.0358684	0.0612291	NA	0.0670105	0.18233	0.0172865	48
Cross-validated	LGG	Age	NA	0.0907764	0.625976	0.647964	NA	0.647964	0.637116	0.618224	33
Cross-validated	LIHC	Age	NA	0.11469	0.453665	0.449427	NA	0.449427	0.483858	0.410466	57
Cross-validated	LUAD	Age	NA	0.0814675	0.0101739	-0.0403582	NA	-0.0443136	-0.00804241	0.00389886	37
Cross-validated	OV	Age	NA	0.0792589	0.332474	0.338608	NA	0.338608	0.34631	0.323399	87
Cross-validated	PAAD	Age	NA	-0.136364	0.251402	0.217304	NA	0.217304	0.267141	0.240749	35
Cross-validated	PCPG	Age	NA	0.289982	0.415816	0.420192	NA	0.420192	0.438545	0.419651	97
Cross-validated	PRAD	Age	NA	0.033136	0.275212	0.268113	NA	0.268113	0.311095	0.285884	305
Cross-validated	SARC	Age	NA	-0.107829	0.541692	0.527856	NA	0.527856	0.484148	0.509176	149
Cross-validated	SKCM	Age	NA	-0.179346	0.148296	0.148296	NA	0.148296	0.148296	0.152209	82
Cross-validated	STAD	Age	NA	0.020227	0.318488	0.313861	NA	0.315344	0.285789	0.319239	176
Cross-validated	TGCT	Age	NA	0.184392	0.128558	0.128558	NA	0.128558	0.128558	0.127152	78
Cross-validated	THCA	Age	NA	0.117653	0.412932	0.414434	NA	0.414434	0.426049	0.443844	287
Cross-validated	THYM	Age	NA	0.229637	0.485247	0.477697	NA	0.477697	0.41769	0.487898	76
Cross-validated	UCEC	Age	NA	0.0667044	0.409955	0.419531	NA	0.419531	0.472899	0.242147	22
Cross-validated	UCS	Age	NA	-0.0681818	-0.106362	-0.106362	NA	-0.106362	-0.106362	-0.183142	35
Cross-validated	UVM	Age	NA	-0.3	0.300377	0.300377	NA	0.300377	0.300377	0.216706	40
Cross-validated	BLCA	Smoking	NA	-0.0498904	0.265149	0.259969	NA	0.056029	0.0732213	0.29807	288
Cross-validated	CESC	Smoking	NA	-0.0519497	0.0233789	-0.0485892	NA	-0.0113008	0.00331132	-0.0195417	217
Cross-validated	ESCAD	Smoking	NA	0.00153931	-0.0151525	-0.0241322	NA	-0.0923277	0.114928	-0.0311721	58
Cross-validated	ESCSQ	Smoking	NA	0.00885227	-0.034277	-0.0570347	NA	-0.0400991	0.0466076	-0.0677986	82
Cross-validated	HNSCC	Smoking	NA	-0.0435179	0.504358	0.55028	NA	0.327239	0.32584	0.554779	354
Cross-validated	KIRP	Smoking	NA	-0.101276	0.147532	0.113018	NA	0.0226052	0.0123669	0.105236	100
Cross-validated	LUAD	Smoking	NA	0.0458313	0.460594	0.462718	NA	0.305025	0.274568	0.460748	375
Cross-validated	PAAD	Smoking	NA	0.0554287	0.106282	0.106282	NA	0.0844927	-0.0328436	0.0936021	113
Age median subset			NA	0.0326723	0.323166	0.316092	NA	0.316834	0.336064	0.3221
Smoking median subset			NA	-0.0209893	0.126907	0.10965	NA	0.0393171	0.0599144	0.099419
