# Supplementary material for: Supervised mutational signatures for obesity and other tissue-specific etiological factors in cancer
Source: eLife. 2021 Jan 25;10:e61082. doi: 10.7554/eLife.61082 (PMC7872524; doi:10.7554/eLife.61082)
Supplement: Supplementary file 4. — After random shuffling, the AUCs, both apparent and cross-validated (CV), are reported for age and all other etiological factors across all tissue types for each one of the mutational signature methodologies considered in this study: Logistic Regression (Logit), Linear Discriminant Analysis (LDA), Non-negative Least Square Logit using the Betas (NNLS_Logit_betas), Non-negative Least Square Logit using the means (NNLS_Logit_means), Random Forest (RF), Unsupervised as in Alexandrov et al. (Unsupervised), Best_NMF, Matched_NMF, Signature one as in Alexandrov et al. (Signature1), and Single Peak (SinglePeak). For their detailed description see Materials and methods. [file elife-61082-supp4.xlsx]

## Sheet: Age Apparent
type	tissue	factor	Best_NMF	LDA	Logit	Matched_NMF	NNLS_Logit_betas	NNLS_Logit_means	RF	Signature1	SinglePeak	Unsupervised	n
Apparent	ACC	Age	0.617391	0.648696	0.648696	NA	0.648696	0.61913	0.713913	0.61913	0.542609	NA	48
Apparent	BLCA	Age	0.651361	0.654337	0.654337	0.59949	0.654337	0.654337	0.728741	0.379252	0.566327	0.379252	97
Apparent	BRCA	Age	0.576222	0.533062	0.533062	0.480617	0.533062	0.533062	0.549688	0.472405	0.492813	0.506964	412
Apparent	CESC	Age	0.613953	0.573127	0.573127	0.50801	0.573127	0.573127	0.590698	0.49509	0.461757	0.49509	88
Apparent	CHOL	Age	0.704142	0.742604	0.748521	NA	0.748521	0.742604	0.801775	0.766272	0.713018	NA	26
Apparent	COAD	Age	0.529396	0.57154	0.57154	0.514048	0.57154	0.57154	0.609781	0.528616	0.543054	0.528616	124
Apparent	ESCAD	Age	0.585873	0.556787	0.556787	0.457064	0.556787	0.556787	0.807479	0.31856	0.530471	0.31856	38
Apparent	ESCSQ	Age	0.645299	0.679487	0.672365	0.576923	0.672365	0.660969	0.733618	0.680912	0.564103	0.680912	53
Apparent	GBM	Age	0.55172	0.506217	0.493783	0.485185	0.5	0.5	0.52209	0.459921	0.389286	0.459921	123
Apparent	HNSCC	Age	0.512642	0.553487	0.553487	0.496527	0.553487	0.553487	0.554876	0.472076	0.44429	0.472076	120
Apparent	KICH	Age	0.50692	0.564014	0.564014	0.50692	0.564014	0.564014	0.695502	0.453287	0.389273	0.3391	34
Apparent	KIRC	Age	0.576006	0.606065	0.606065	0.576006	0.606065	0.606065	0.606197	0.494703	0.523835	0.545551	123
Apparent	KIRP	Age	0.52849	0.539174	0.539174	0.35755	0.539174	0.539174	0.587607	0.480057	0.439459	0.403134	53
Apparent	LAML	Age	0.527778	0.59809	0.59809	0.527778	0.59809	0.59809	0.615451	0.460938	0.546875	0.576389	48
Apparent	LGG	Age	0.614815	0.592593	0.592593	0.459259	0.592593	0.592593	0.685185	0.457407	0.553704	0.490741	33
Apparent	LIHC	Age	0.580049	0.603448	0.603448	0.39532	0.603448	0.603448	0.679803	0.517241	0.522167	0.543103	57
Apparent	LUAD	Age	0.645062	0.75	0.75	0.645062	0.75	0.75	0.774691	0.575617	0.62037	0.575617	37
Apparent	OV	Age	0.576087	0.574231	0.574231	0.529427	0.574231	0.574231	0.574761	0.494698	0.528897	0.494698	87
Apparent	PAAD	Age	0.610526	0.566667	0.566667	0.542105	0.566667	0.566667	0.777193	0.5	0.447368	0.5	35
Apparent	PCPG	Age	0.579932	0.571854	0.571854	0.522959	0.571854	0.571854	0.590136	0.560374	0.518495	0.509354	97
Apparent	PRAD	Age	0.528344	0.521742	0.521742	0.5	0.521742	0.521742	0.567333	0.478151	0.51329	0.511355	305
Apparent	SARC	Age	0.52181	0.540735	0.540735	0.510094	0.540735	0.540735	0.572459	0.502523	0.490717	0.487924	149
Apparent	SKCM	Age	0.525877	0.533314	0.533314	0.464604	0.533314	0.533314	0.595181	0.483046	0.488102	0.483046	82
Apparent	STAD	Age	0.541344	0.544186	0.544186	0.541344	0.544186	0.544186	0.548062	0.540181	0.436305	0.540181	176
Apparent	TGCT	Age	0.519737	0.622039	0.622039	0.492763	0.622039	0.622039	0.646053	0.402632	0.543092	0.513158	78
Apparent	THCA	Age	0.552284	0.539796	0.539796	0.462391	0.539796	0.539796	0.54174	0.521064	0.525	0.510398	287
Apparent	THYM	Age	0.662855	0.629938	0.629938	0.560638	0.629938	0.629938	0.64657	0.4158	0.55648	0.562024	76
Apparent	UCEC	Age	0.780992	0.884298	0.884298	0.380165	0.884298	0.884298	0.884298	0.561983	0.77686	0.710744	22
Apparent	UCS	Age	0.651961	0.738562	0.74183	NA	0.74183	0.689542	0.70915	0.506536	0.521242	NA	35
Apparent	UVM	Age	0.57375	0.57	0.57	NA	0.57	0.57	0.615	0.585	0.61625	NA	40
Apparent	Median	Age	0.576155	0.57249	0.57249	0.507465	0.57249	0.57249	0.615226	0.494897	0.524417	0.508159	NA
Apparent	Subset median	Age	0.576047	0.571697	0.571697	0.507465	0.571697	0.571697	0.607989	0.488872	0.523001	0.508159	NA
Apparent	Overall median	Age	0.576155	0.57249	0.57249	0.5	0.57249	0.57249	0.615226	0.494897	0.524417	0.5	NA
The "Subset median" AUC is the median AUC calculated only over the tissues where Alexandrov et al. found an age signature.
To calculate the "Overall median" AUC, whenever Alexandrov et al. methodology was not able to detect the age signature in a tissue, and therefore its intensities were not provided (NA), a 0.5 AUC was assigned to that signature for that tissue for their methodology.

## Sheet: Other Exposures Apparent
type	tissue	factor	Best_NMF	LDA	Logit	Matched_NMF	NNLS_Logit_betas	NNLS_Logit_means	RF	Signature1	SinglePeak	Unsupervised	n
Apparent	ESCA	Alcohol	0.685185	0.814815	0.768519	NA	0.768519	0.768519	0.847222	NA	NA	NA	30
Apparent	HNSCC	Alcohol	0.592166	0.260369	0.739631	NA	0.5	0.5	0.747696	NA	NA	NA	45
Apparent	LIHC	Alcohol	0.562156	0.658316	0.655733	NA	0.655733	0.651429	0.67958	NA	NA	NA	154
Apparent	BLCA	Aristolochic Acid	0.551703	0.335604	0.664396	0.465635	0.5	0.5	0.747059	NA	NA	0.457895	104
Apparent	MESO	Asbestos	0.577273	0.366477	0.633523	NA	0.5	0.366477	0.640909	NA	NA	NA	62
Apparent	BRCA	BRCA1/2 Mutation	0.54085	0.578013	0.578013	0.472222	0.578013	0.5	0.638452	NA	NA	0.504605	727
Apparent	OV	BRCA1/2 Mutation	0.596491	0.367277	0.632723	0.506865	0.5	0.5	0.635584	NA	NA	0.516781	157
Apparent	LIHC	Hepatitis B	0.57197	0.593409	0.593409	NA	0.593409	0.593409	0.61197	NA	NA	NA	163
Apparent	LIHC	Hepatitis C	0.625	0.659091	0.658724	NA	0.658724	0.67632	0.714443	NA	NA	NA	119
Apparent	CESC	High Apobec	0.555958	0.434238	0.565762	0.465158	0.5	0.5	0.655958	NA	NA	0.444947	116
Apparent	KIRC	High Apobec	0.606936	0.57659	0.57659	NA	0.57659	0.57659	0.692437	NA	NA	NA	197
Apparent	GBM	IDH Methylated	0.609979	0.629292	0.629292	NA	0.629292	0.629292	0.696486	NA	NA	NA	249
Apparent	LGG	IDH Methylated	0.572259	0.575932	0.575932	NA	0.575932	0.575932	0.61401	NA	NA	NA	446
Apparent	GBM	MGMT Methylated	0.533148	0.544055	0.544055	NA	0.544055	0.544055	0.583043	NA	NA	NA	232
Apparent	LGG	MGMT Methylated	0.553571	0.519481	0.519481	NA	0.519481	0.5	0.736201	NA	NA	NA	89
Apparent	COAD	MSI	0.601519	0.652612	0.652612	0.425451	0.652612	0.652612	0.68471	NA	NA	0.467996	222
Apparent	STAD	MSI	0.57364	0.562463	0.562463	0.506655	0.562463	0.562463	0.588852	NA	NA	0.469401	336
Apparent	UCEC	MSI	0.578042	0.549934	0.549934	0.482804	0.549934	0.549934	0.643849	NA	NA	0.484458	120
Apparent	COAD	Obesity	0.600966	0.607697	0.607697	NA	0.607697	0.607697	0.615113	NA	NA	NA	249
Apparent	ESCA	Obesity	0.625616	0.653941	0.699507	NA	0.699507	0.676108	0.781404	NA	NA	NA	57
Apparent	KIRP	Obesity	0.521371	0.441935	0.558065	NA	0.5	0.5	0.583871	NA	NA	NA	71
Apparent	UCEC	Obesity	0.564086	0.394318	0.605682	NA	0.5	0.5	0.61654	NA	NA	NA	233
Apparent	STAD	POLD Mutation	0.666667	0.714766	0.69298	NA	0.602071	0.686525	0.86404	NA	NA	NA	301
Apparent	UCEC	POLD Mutation	0.697421	0.68254	0.686508	NA	0.674603	0.678571	0.74504	NA	NA	NA	50
Apparent	BRCA	POLe Mutation	0.683809	0.695745	0.673595	0.532251	0.673595	0.694108	0.829242	NA	NA	0.555677	719
Apparent	COAD	POLe Mutation	0.628365	0.640545	0.695513	0.509615	0.694231	0.679167	0.751122	NA	NA	0.459936	211
Apparent	STAD	POLe Mutation	0.563414	0.363544	0.636456	NA	0.5	0.5	0.680254	NA	NA	NA	307
Apparent	UCEC	POLe Mutation	0.67381	0.636508	0.616667	0.625397	0.616667	0.605556	0.732937	NA	NA	0.671429	71
Apparent	BLCA	Smoking	0.566387	0.560185	0.560185	0.566387	0.560185	0.560185	0.569806	NA	0.492843	0.556592	288
Apparent	CESC	Smoking	0.525411	0.531113	0.531113	NA	0.531113	0.5	0.640283	NA	0.507755	NA	217
Apparent	ESCAD	Smoking	0.608696	0.655901	0.655901	NA	0.655901	0.655901	0.765217	NA	0.536025	NA	58
Apparent	ESCSQ	Smoking	0.595966	0.383865	0.616135	0.532856	0.5	0.5	0.673715	NA	0.577424	0.571568	82
Apparent	HNSCC	Smoking	0.560804	0.61638	0.61638	0.564438	0.61638	0.61638	0.651829	NA	0.567305	0.562258	354
Apparent	KIRP	Smoking	0.592262	0.443824	0.556176	0.467262	0.5	0.5	0.713914	NA	0.461682	0.453125	100
Apparent	LUAD	Smoking	0.525739	0.38001	0.61999	0.458547	0.5	0.5	0.629371	NA	0.477576	0.481101	375
Apparent	PAAD	Smoking	0.540164	0.451139	0.548861	NA	0.5	0.5	0.614801	NA	0.487508	NA	113
Apparent	SKCM	UV	0.516749	0.464247	0.535753	0.517332	0.5	0.5	0.573039	NA	NA	0.500899	374
Apparent	Median	NA	0.577273	0.562463	0.61638	0.50676	0.562463	0.560185	0.673715	NA	0.500299	0.492679	NA
Apparent	Subset median	NA	0.575841	0.55506	0.616258	0.50676	0.55506	0.524967	0.653893	NA	NA	0.492679	NA
Apparent	Subset smoking median	Smoking	0.566387	0.443824	0.616135	0.532856	0.5	0.5	0.651829	NA	0.492843	0.556592	NA
Apparent	Overall smoking median	Smoking	0.563595	0.491126	0.58816	0.5	0.5	0.5	0.629371	NA	0.5	0.5	NA
The "Subset median" AUC is the median AUC calculated only over the tissues where Alexandrov et al. found a signature for the given exposure.
The "Subset smoking median" was instead calculated by restricting the set of tissues to those where Alexandrov et al. detected smoking signatures.
To calculate the "Overall smoking median" AUC, whenever Alexandrov et al. methodology was not able to detect a smoking signature in a tissue, and therefore its intensities were not provided (NA), a 0.5 AUC was assigned for their methodology to the smoking signature for that tissue.

## Sheet: Age Cross-validated
type	tissue	factor	Best_NMF	LDA	Logit	Matched_NMF	NNLS_Logit_betas	NNLS_Logit_means	RF	Signature1	SinglePeak	Unsupervised	n
Cross-validated	ACC	Age	0.434	0.5318	0.5238	NA	0.5278	0.5346	0.4734	NA	NA	NA	48
Cross-validated	BLCA	Age	0.6124	0.602867	0.582422	0.632578	0.6018	0.6322	0.624778	NA	NA	NA	97
Cross-validated	BRCA	Age	0.537275	0.511747	0.511747	0.500494	0.511747	0.511747	0.506856	NA	NA	NA	412
Cross-validated	CESC	Age	0.574753	0.486204	0.486204	0.504012	0.486204	0.486204	0.462778	NA	NA	NA	88
Cross-validated	CHOL	Age	0.652222	0.639444	0.642778	NA	0.642778	0.629444	0.648333	NA	NA	NA	26
Cross-validated	COAD	Age	0.521714	0.485217	0.485217	0.530648	0.485217	0.485217	0.486158	NA	NA	NA	124
Cross-validated	ESCAD	Age	0.408194	0.424583	0.372083	0.443472	0.398333	0.398333	0.337917	NA	NA	NA	38
Cross-validated	ESCSQ	Age	0.516756	0.540467	0.545489	0.627822	0.545489	0.555622	0.504156	NA	NA	NA	53
Cross-validated	GBM	Age	0.503013	0.438632	0.532329	0.466485	0.485481	0.485481	0.420128	NA	NA	NA	123
Cross-validated	HNSCC	Age	0.43738	0.515366	0.517866	0.52003	0.516616	0.516616	0.496545	NA	NA	NA	120
Cross-validated	KICH	Age	0.406667	0.506283	0.383611	0.506944	0.452222	0.447778	0.340972	NA	NA	NA	34
Cross-validated	KIRC	Age	0.519153	0.525722	0.525722	0.540662	0.525722	0.525722	0.50992	NA	NA	NA	123
Cross-validated	KIRP	Age	0.453644	0.412384	0.410556	0.369422	0.415889	0.415889	0.414156	NA	NA	NA	53
Cross-validated	LAML	Age	0.4105	0.4608	0.4608	0.4661	0.4608	0.4608	0.4586	NA	NA	NA	48
Cross-validated	LGG	Age	0.578333	0.608889	0.608889	0.484444	0.608889	0.608889	0.477778	NA	NA	NA	33
Cross-validated	LIHC	Age	0.4876	0.475	0.475	0.557889	0.475	0.475	0.469	NA	NA	NA	57
Cross-validated	LUAD	Age	0.618472	0.65125	0.635417	0.519444	0.634167	0.67625	0.699167	NA	NA	NA	37
Cross-validated	OV	Age	0.528019	0.422352	0.422352	0.56242	0.422352	0.422352	0.429481	NA	NA	NA	87
Cross-validated	PAAD	Age	0.465	0.526111	0.399444	0.503333	0.462778	0.462778	0.631111	NA	NA	NA	35
Cross-validated	PCPG	Age	0.535798	0.490412	0.490412	0.526449	0.490412	0.490412	0.49279	NA	NA	NA	97
Cross-validated	PRAD	Age	0.496624	0.445871	0.445871	0.504237	0.445871	0.445871	0.459699	NA	NA	NA	305
Cross-validated	SARC	Age	0.507705	0.459148	0.459148	0.504306	0.459148	0.459148	0.472406	NA	NA	NA	149
Cross-validated	SKCM	Age	0.442762	0.478102	0.459282	0.480204	0.468692	0.468692	0.43679	NA	NA	NA	82
Cross-validated	STAD	Age	0.473032	0.498184	0.498184	0.522052	0.498184	0.498184	0.476093	NA	NA	NA	176
Cross-validated	TGCT	Age	0.475268	0.616295	0.616295	0.486429	0.616295	0.616295	0.586741	NA	NA	NA	78
Cross-validated	THCA	Age	0.503287	0.494102	0.494102	0.481508	0.494102	0.494102	0.492714	NA	NA	NA	287
Cross-validated	THYM	Age	0.6328	0.581754	0.581754	0.575128	0.581754	0.581754	0.582213	NA	NA	NA	76
Cross-validated	UCEC	Age	0.798333	0.713333	0.786667	0.47	0.786667	0.776667	0.771667	NA	NA	NA	22
Cross-validated	UCS	Age	0.509306	0.510972	0.506806	NA	0.505139	0.506806	0.463333	NA	NA	NA	35
Cross-validated	UVM	Age	0.35875	0.36625	0.36625	NA	0.36625	0.36625	0.32375	NA	NA	NA	40
Cross-validated	Median	Age	0.505496	0.502234	0.496143	0.504271	0.492257	0.492257	0.476935	NA	NA	NA	NA
Cross-validated	Subset median	Age	0.505496	0.496143	0.492257	0.504271	0.488308	0.488308	0.481968	NA	NA	NA	NA
Cross-validated	Overall median	Age	0.505496	0.502234	0.496143	0.503673	0.492257	0.492257	0.476935	NA	NA	NA	NA
The "Subset median" AUC is the median AUC calculated only over the tissues where Alexandrov et al. found an age signature.
To calculate the "Overall median" AUC, whenever Alexandrov et al. methodology was not able to detect the age signature in a tissue, and therefore its intensities were not provided (NA), a 0.5 AUC was assigned to that signature for that tissue for their methodology.

## Sheet: Other Exposures Cross-validated
type	tissue	factor	Best_NMF	LDA	Logit	Matched_NMF	NNLS_Logit_betas	NNLS_Logit_means	RF	Signature1	SinglePeak	Unsupervised	n
Cross-validated	ESCA	Alcohol	0.585	0.619722	0.630833	NA	0.635833	0.598333	0.524167	NA	NA	NA	30
Cross-validated	HNSCC	Alcohol	0.501746	0.318889	0.548889	NA	0.433889	0.433889	0.510397	NA	NA	NA	45
Cross-validated	LIHC	Alcohol	0.483558	0.616719	0.614229	NA	0.614229	0.607562	0.604235	NA	NA	NA	154
Cross-validated	BLCA	Aristolochic Acid	0.449608	0.457843	0.542157	0.494216	0.5	0.5	0.530588	NA	NA	NA	104
Cross-validated	MESO	Asbestos	0.588	0.461	0.53475	NA	0.497875	0.46925	0.548625	NA	NA	NA	62
Cross-validated	BRCA	BRCA1/2 Mutation	0.472589	0.53604	0.509975	0.46331	0.523008	0.49323	0.497726	NA	NA	NA	727
Cross-validated	OV	BRCA1/2 Mutation	0.544332	0.479489	0.405675	0.486448	0.442582	0.442582	0.41435	NA	NA	NA	157
Cross-validated	LIHC	Hepatitis B	0.556523	0.522806	0.48583	NA	0.504318	0.49617	0.486126	NA	NA	NA	163
Cross-validated	LIHC	Hepatitis C	0.536815	0.502846	0.498095	NA	0.499972	0.471833	0.516701	NA	NA	NA	119
Cross-validated	CESC	High Apobec	0.507105	0.494168	0.434755	0.465021	0.464462	0.457385	0.435413	NA	NA	NA	116
Cross-validated	KIRC	High Apobec	0.526404	0.498763	0.476081	NA	0.487422	0.479308	0.471588	NA	NA	NA	197
Cross-validated	GBM	IDH Methylated	0.540889	0.49669	0.467704	NA	0.482197	0.482197	0.471972	NA	NA	NA	249
Cross-validated	LGG	IDH Methylated	0.518145	0.522879	0.507718	NA	0.515299	0.515299	0.519491	NA	NA	NA	446
Cross-validated	GBM	MGMT Methylated	0.485394	0.476908	0.418443	NA	0.447676	0.45706	0.41907	NA	NA	NA	232
Cross-validated	LGG	MGMT Methylated	0.472128	0.446201	0.412817	NA	0.429509	0.469978	0.431212	NA	NA	NA	89
Cross-validated	COAD	MSI	0.553521	0.525248	0.502581	0.441453	0.513915	0.513915	0.513111	NA	NA	NA	222
Cross-validated	STAD	MSI	0.503775	0.496902	0.48609	0.524307	0.491496	0.491496	0.458068	NA	NA	NA	336
Cross-validated	UCEC	MSI	0.511493	0.49	0.424496	0.50464	0.457248	0.457248	0.410177	NA	NA	NA	120
Cross-validated	COAD	Obesity	0.593958	0.558471	0.549023	NA	0.553747	0.543499	0.540154	NA	NA	NA	249
Cross-validated	ESCA	Obesity	0.501244	0.492578	0.538156	NA	0.545133	0.570467	0.507356	NA	NA	NA	57
Cross-validated	KIRP	Obesity	0.452262	0.472619	0.394286	NA	0.433452	0.460119	0.403333	NA	NA	NA	71
Cross-validated	UCEC	Obesity	0.481314	0.551311	0.458082	NA	0.504696	0.506748	0.465158	NA	NA	NA	233
Cross-validated	STAD	POLD Mutation	0.586199	0.565216	0.537255	NA	0.531195	0.627673	0.609882	NA	NA	NA	301
Cross-validated	UCEC	POLD Mutation	0.550119	0.484048	0.40631	NA	0.417381	0.508452	0.566369	NA	NA	NA	50
Cross-validated	BRCA	POLe Mutation	0.570552	0.568183	0.525604	0.549316	0.540422	0.641074	0.591717	NA	NA	NA	719
Cross-validated	COAD	POLe Mutation	0.589744	0.543034	0.525342	0.485128	0.532009	0.559786	0.570556	NA	NA	NA	211
Cross-validated	STAD	POLe Mutation	0.483219	0.443365	0.522583	NA	0.482974	0.482974	0.519154	NA	NA	NA	307
Cross-validated	UCEC	POLe Mutation	0.602245	0.577245	0.574796	0.608214	0.577245	0.565714	0.562041	NA	NA	NA	71
Cross-validated	BLCA	Smoking	0.547295	0.501719	0.485466	0.568184	0.493593	0.493593	0.48378	NA	NA	NA	288
Cross-validated	CESC	Smoking	0.465217	0.529086	0.461083	NA	0.495084	0.487191	0.49255	NA	NA	NA	217
Cross-validated	ESCAD	Smoking	0.537286	0.554286	0.446857	NA	0.500571	0.525714	0.458714	NA	NA	NA	58
Cross-validated	ESCSQ	Smoking	0.464236	0.443048	0.428709	0.584891	0.435879	0.435879	0.42223	NA	NA	NA	82
Cross-validated	HNSCC	Smoking	0.527318	0.594209	0.535935	0.569563	0.565072	0.558645	0.593873	NA	NA	NA	354
Cross-validated	KIRP	Smoking	0.449118	0.569375	0.353762	0.469216	0.461569	0.467402	0.378162	NA	NA	NA	100
Cross-validated	LUAD	Smoking	0.507623	0.389326	0.610674	0.45961	0.5	0.5	0.608533	NA	NA	NA	375
Cross-validated	PAAD	Smoking	0.447304	0.50749	0.400552	NA	0.454021	0.454021	0.408853	NA	NA	NA	113
Cross-validated	SKCM	UV	0.483295	0.510112	0.432837	0.508605	0.471474	0.481603	0.413687	NA	NA	NA	374
Cross-validated	Median	NA	0.511493	0.502846	0.48609	0.499428	0.497875	0.49323	0.497726	NA	NA	NA	NA
Cross-validated	Subset median	NA	0.509558	0.505916	0.494335	0.499428	0.496796	0.493411	0.490753	NA	NA	NA	NA
Cross-validated	Subset smoking median	Smoking	0.507623	0.501719	0.485466	0.568184	0.493593	0.493593	0.48378	NA	NA	NA	NA
Cross-validated	Overall smoking median	Smoking	0.48642	0.518288	0.45397	0.5	0.494338	0.490392	0.471247	NA	NA	NA	NA
The "Subset median" AUC is the median AUC calculated only over the tissues where Alexandrov et al. found a signature for the given exposure.
The "Subset smoking median" was instead calculated by restricting the set of tissues to those where Alexandrov et al. detected smoking signatures.
To calculate the "Overall smoking median" AUC, whenever Alexandrov et al. methodology was not able to detect a smoking signature in a tissue, and therefore its intensities were not provided (NA), a 0.5 AUC was assigned for their methodology to the smoking signature for that tissue.
