# Supplementary material for: Supervised mutational signatures for obesity and other tissue-specific etiological factors in cancer
Source: eLife. 2021 Jan 25;10:e61082. doi: 10.7554/eLife.61082 (PMC7872524; doi:10.7554/eLife.61082)
Supplement: Supplementary file 5. — The AUCs, both apparent and cross-validated (CV), are reported for age and all other etiological factors across all tissue types for each one of the mutational signature methodologies considered in this study: Logistic Regression (Logit), Linear Discriminant Analysis (LDA), Non-negative Least Square Logit using the Betas (NNLS_Logit_betas), Non-negative Least Square Logit using the means (NNLS_Logit_means), Random Forest (RF), Unsupervised as in Alexandrov et al. (Unsupervised), Best_NMF, Matched_NMF, Signature one as in Alexandrov et al. (Signature1), and Single Peak (SinglePeak). For their detailed description see Materials and methods. [file elife-61082-supp5.xlsx]

## Sheet: Age Apparent (5%)
type	tissue	factor	Best_NMF	LDA	Logit	Matched_NMF	NNLS_Logit_betas	NNLS_Logit_means	RF	Signature1	SinglePeak	Unsupervised	n
Apparent	ACC	Age	0.598261	0.776522	0.776522	NA	0.776522	0.776522	0.842609	0.471304	0.74	NA	48
Apparent	BLCA	Age	0.634566	0.728104	0.727253	0.488095	0.727253	0.661777	0.783376	0.654337	0.624787	0.654337	97
Apparent	BRCA	Age	0.621091	0.611665	0.611665	0.581183	0.611665	0.611665	0.611665	0.55519	0.568081	0.604666	412
Apparent	CESC	Age	0.721447	0.7323	0.760724	0.721447	0.760724	0.725065	0.780362	0.568734	0.614729	0.568734	88
Apparent	CHOL	Age	0.491124	0.786982	0.786982	NA	0.786982	0.751479	0.766272	0.553254	0.627219	NA	26
Apparent	COAD	Age	0.59001	0.693939	0.674168	0.597034	0.674168	0.663241	0.742066	0.590531	0.684053	0.590531	124
Apparent	ESCAD	Age	0.601108	0.65651	0.682825	0.592798	0.682825	0.610803	0.753463	0.573407	0.51662	0.573407	38
Apparent	ESCSQ	Age	0.58547	0.653846	0.641026	0.565527	0.641026	0.618234	0.660256	0.575499	0.487179	0.575499	53
Apparent	GBM	Age	0.677778	0.714418	0.714683	0.627513	0.714683	0.709392	0.751455	0.612302	0.682672	0.612302	123
Apparent	HNSCC	Age	0.714365	0.813559	0.813837	0.613087	0.813837	0.73965	0.791887	0.671159	0.745763	0.671159	120
Apparent	KICH	Age	0.82872	0.797578	0.797578	0.541522	0.797578	0.849481	0.880623	0.709343	0.858131	0.761246	34
Apparent	KIRC	Age	0.657839	0.818591	0.82071	0.576404	0.82071	0.754767	0.812897	0.551112	0.771716	0.724311	123
Apparent	KIRP	Age	0.688034	0.762108	0.760684	0.688034	0.760684	0.745014	0.774929	0.494302	0.717949	0.705128	53
Apparent	LAML	Age	0.706597	0.72309	0.72309	0.706597	0.72309	0.690104	0.784722	0.585069	0.615451	0.635417	48
Apparent	LGG	Age	0.766667	0.883333	0.883333	0.85	0.883333	0.883333	0.883333	0.792593	0.877778	0.944444	33
Apparent	LIHC	Age	0.573276	0.749384	0.736453	0.525862	0.736453	0.737685	0.775862	0.549261	0.674261	0.674877	57
Apparent	LUAD	Age	0.614198	0.637346	0.58642	0.520062	0.58642	0.617284	0.725309	0.45679	0.574074	0.45679	37
Apparent	OV	Age	0.526511	0.729586	0.731177	0.516967	0.731177	0.719512	0.728261	0.671792	0.540032	0.671792	87
Apparent	PAAD	Age	0.533333	0.684211	0.636842	0.578947	0.636842	0.636842	0.712281	0.638596	0.533333	0.638596	35
Apparent	PCPG	Age	0.704294	0.748087	0.745111	0.742772	0.745111	0.745111	0.767219	0.523384	0.778274	0.753401	97
Apparent	PRAD	Age	0.607054	0.672817	0.674366	0.607054	0.674366	0.663527	0.684903	0.560452	0.691785	0.608925	305
Apparent	SARC	Age	0.749189	0.80128	0.787851	0.798486	0.787851	0.785148	0.820115	0.692682	0.79398	0.805876	149
Apparent	SKCM	Age	0.624628	0.621356	0.621356	0.489887	0.621356	0.621356	0.690958	0.483046	0.533908	0.483046	82
Apparent	STAD	Age	0.641344	0.686047	0.686047	0.641344	0.686047	0.685917	0.702067	0.612726	0.604974	0.612726	176
Apparent	TGCT	Age	0.692763	0.601645	0.601645	0.601974	0.601645	0.601645	0.61875	0.432895	0.6	0.613158	78
Apparent	THCA	Age	0.664845	0.769218	0.769023	0.664845	0.769023	0.765039	0.787245	0.518149	0.745311	0.774514	287
Apparent	THYM	Age	0.727651	0.769231	0.769231	0.684685	0.769231	0.739432	0.781358	0.595981	0.710672	0.718642	76
Apparent	UCEC	Age	0.785124	0.652893	0.756198	0.454545	0.756198	0.756198	0.822314	0.661157	0.578512	0.561983	22
Apparent	UCS	Age	0.633987	0.570261	0.570261	NA	0.570261	0.570261	0.665033	0.633987	0.609477	NA	35
Apparent	UVM	Age	0.6775	0.69375	0.69375	NA	0.69375	0.69375	0.71875	0.29	0.58625	NA	40
Apparent	Median	Age	0.649591	0.725597	0.729215	0.599504	0.729215	0.714452	0.766746	0.574453	0.626003	0.637007	NA
Apparent	Subset median	Age	0.661342	0.725597	0.729215	0.599504	0.729215	0.714452	0.771074	0.580284	0.649524	0.637007	NA
Apparent	Overall median	Age	0.649591	0.725597	0.729215	0.58699	0.729215	0.714452	0.766746	0.574453	0.626003	0.612942	NA
The "Subset median" AUC is the median AUC calculated only over the tissues where Alexandrov et al. found an age signature.
To calculate the "Overall median" AUC, whenever Alexandrov et al. methodology was not able to detect the age signature in a tissue, and therefore its intensities were not provided (NA), a 0.5 AUC was assigned to that signature for that tissue for their methodology.

## Sheet: Other Exposures Apparent (5%)
type	tissue	factor	Best_NMF	LDA	Logit	Matched_NMF	NNLS_Logit_betas	NNLS_Logit_means	RF	Signature1	SinglePeak	Unsupervised	n
Apparent	ESCA	Alcohol	0.773148	0.763889	0.763889	NA	0.662037	0.5	0.80787	NA	NA	NA	30
Apparent	HNSCC	Alcohol	0.596774	0.309908	0.690092	NA	0.5	0.5	0.702765	NA	NA	NA	45
Apparent	LIHC	Alcohol	0.61312	0.669163	0.664687	NA	0.664687	0.655906	0.710055	NA	NA	NA	154
Apparent	BLCA	Aristolochic Acid	0.890093	0.993498	0.988854	0.890093	0.988854	0.990093	0.996904	NA	NA	0.964396	104
Apparent	MESO	Asbestos	0.9375	0.986364	0.993182	NA	0.993182	0.985227	0.98125	NA	NA	NA	62
Apparent	BRCA	BRCA1/2 Mutation	0.706731	0.826441	0.829331	0.732069	0.829331	0.815305	0.865501	NA	NA	0.670274	727
Apparent	OV	BRCA1/2 Mutation	0.812738	0.822273	0.823036	0.662853	0.823036	0.822654	0.855072	NA	NA	0.809687	157
Apparent	LIHC	Hepatitis B	0.587576	0.643485	0.643485	NA	0.643485	0.643485	0.659091	NA	NA	NA	163
Apparent	LIHC	Hepatitis C	0.626283	0.692082	0.693182	NA	0.693182	0.667155	0.757148	NA	NA	NA	119
Apparent	CESC	High Apobec	0.676772	0.64917	0.655204	0.608145	0.653394	0.640724	0.696531	NA	NA	0.638612	116
Apparent	KIRC	High Apobec	0.58237	0.653059	0.651614	NA	0.651614	0.652577	0.694364	NA	NA	NA	197
Apparent	GBM	IDH Methylated	0.714861	0.675697	0.695815	NA	0.689378	0.504292	0.786481	NA	NA	NA	249
Apparent	LGG	IDH Methylated	0.792295	0.736712	0.736919	NA	0.736919	0.667282	0.754148	NA	NA	NA	446
Apparent	GBM	MGMT Methylated	0.656997	0.764601	0.764601	NA	0.764601	0.764601	0.768933	NA	NA	NA	232
Apparent	LGG	MGMT Methylated	0.693452	0.769481	0.768939	NA	0.768939	0.762987	0.797078	NA	NA	NA	89
Apparent	COAD	MSI	0.912821	0.987464	0.989364	0.968851	0.989364	0.987464	0.982621	NA	NA	0.967047	222
Apparent	STAD	MSI	0.926794	0.993825	0.994123	0.999638	0.994123	0.997768	0.987465	NA	NA	0.999855	336
Apparent	UCEC	MSI	0.933036	0.999008	0.999008	0.971726	0.999008	0.999008	0.999008	NA	NA	1	120
Apparent	COAD	Obesity	0.569592	0.586249	0.586249	NA	0.586249	0.586249	0.614428	NA	NA	NA	249
Apparent	ESCA	Obesity	0.685961	0.688424	0.687192	NA	0.534483	0.701355	0.861453	NA	NA	NA	57
Apparent	KIRP	Obesity	0.643548	0.739516	0.767742	NA	0.767742	0.825	0.829435	NA	NA	NA	71
Apparent	UCEC	Obesity	0.59687	0.34271	0.65729	NA	0.5	0.5	0.665327	NA	NA	NA	233
Apparent	STAD	POLD Mutation	0.985043	1	1	NA	1	1	0.999193	NA	NA	NA	301
Apparent	UCEC	POLD Mutation	0.9375	0.996032	0.996032	NA	0.996032	0.996032	0.998016	NA	NA	NA	50
Apparent	BRCA	POLe Mutation	0.669427	0.729842	0.729405	0.586402	0.729405	0.726023	0.757119	NA	NA	0.423295	719
Apparent	COAD	POLe Mutation	0.93766	1	1	0.629808	1	1	1	NA	NA	0.722756	211
Apparent	STAD	POLe Mutation	0.9428	0.999448	0.999264	NA	0.999264	0.996503	0.998896	NA	NA	NA	307
Apparent	UCEC	POLe Mutation	0.819048	1	1	0.762698	1	1	1	NA	NA	0.734127	71
Apparent	BLCA	Smoking	0.671284	0.702057	0.70084	0.671284	0.70084	0.690061	0.735613	NA	0.64022	0.683918	288
Apparent	CESC	Smoking	0.55958	0.427007	0.572993	NA	0.5	0.5	0.586086	NA	0.428102	NA	217
Apparent	ESCAD	Smoking	0.57764	0.649689	0.648447	NA	0.648447	0.639752	0.660248	NA	0.582609	NA	58
Apparent	ESCSQ	Smoking	0.56799	0.450553	0.549447	0.453481	0.5	0.5	0.64216	NA	0.52635	0.470072	82
Apparent	HNSCC	Smoking	0.750848	0.805677	0.813106	0.755572	0.813106	0.805677	0.834948	NA	0.695333	0.818213	354
Apparent	KIRP	Smoking	0.512649	0.700149	0.700149	0.512649	0.700149	0.694196	0.764509	NA	0.608259	0.625744	100
Apparent	LUAD	Smoking	0.845985	0.912865	0.912865	0.883158	0.912865	0.912865	0.928454	NA	0.90981	0.910619	375
Apparent	PAAD	Smoking	0.595193	0.558033	0.558033	NA	0.558033	0.558033	0.561512	NA	0.548545	NA	113
Apparent	SKCM	UV	0.922796	0.955657	0.970101	0.888765	0.970101	0.970303	0.966465	NA	NA	0.949633	374
Apparent	Median	NA	0.693452	0.739516	0.763889	0.74382	0.736919	0.726023	0.797078	NA	0.595434	0.771907	NA
Apparent	Subset median	NA	0.815893	0.869653	0.871098	0.74382	0.871098	0.86776	0.896977	NA	NA	0.771907	NA
Apparent	Subset smoking median	Smoking	0.671284	0.702057	0.70084	0.671284	0.70084	0.694196	0.764509	NA	0.64022	0.683918	NA
Apparent	Overall smoking median	Smoking	0.586416	0.674919	0.674298	0.506324	0.558033	0.558033	0.64216	NA	0.548545	0.562872	NA
The "Subset median" AUC is the median AUC calculated only over the tissues where Alexandrov et al. found a signature for the given exposure.
The "Subset smoking median" was instead calculated by restricting the set of tissues to those where Alexandrov et al. detected smoking signatures.
To calculate the "Overall smoking median" AUC, whenever Alexandrov et al. methodology was not able to detect a smoking signature in a tissue, and therefore its intensities were not provided (NA), a 0.5 AUC was assigned for their methodology to the smoking signature for that tissue.

## Sheet: Age CV (5%)
type	tissue	factor	Best_NMF	LDA	Logit	Matched_NMF	NNLS_Logit_betas	NNLS_Logit_means	RF	Signature1	SinglePeak	Unsupervised	n
Cross-validated	ACC	Age	0.609467	0.726533	0.736933	NA	0.736933	0.759667	0.723867	NA	NA	NA	48
Cross-validated	BLCA	Age	0.584395	0.691052	0.687765	0.524333	0.687765	0.668882	0.709574	NA	NA	NA	97
Cross-validated	BRCA	Age	0.604439	0.610699	0.610699	0.572031	0.610699	0.610699	0.608955	NA	NA	NA	412
Cross-validated	CESC	Age	0.68663	0.689953	0.720118	0.697936	0.720118	0.687751	0.702423	NA	NA	NA	88
Cross-validated	CHOL	Age	0.481111	0.742222	0.748889	NA	0.748889	0.763333	0.707222	NA	NA	NA	26
Cross-validated	COAD	Age	0.591996	0.601102	0.600457	0.636297	0.600457	0.5848	0.645391	NA	NA	NA	124
Cross-validated	ESCAD	Age	0.563	0.572917	0.565	0.523333	0.565	0.537	0.51375	NA	NA	NA	38
Cross-validated	ESCSQ	Age	0.473138	0.48	0.4878	0.581571	0.489133	0.502352	0.501362	NA	NA	NA	53
Cross-validated	GBM	Age	0.671411	0.691153	0.693352	0.621322	0.693352	0.698175	0.715487	NA	NA	NA	123
Cross-validated	HNSCC	Age	0.724698	0.677366	0.666181	0.622312	0.666181	0.684463	0.710545	NA	NA	NA	120
Cross-validated	KICH	Age	0.870722	0.684222	0.690889	0.641	0.690889	0.718667	0.727944	NA	NA	NA	34
Cross-validated	KIRC	Age	0.67149	0.801819	0.789118	0.67054	0.789118	0.748399	0.740177	NA	NA	NA	123
Cross-validated	KIRP	Age	0.719648	0.72846	0.722546	0.727314	0.722546	0.739422	0.722843	NA	NA	NA	53
Cross-validated	LAML	Age	0.576467	0.612633	0.610633	0.576467	0.612233	0.567433	0.628517	NA	NA	NA	48
Cross-validated	LGG	Age	0.807889	0.879833	0.8815	0.843	0.8815	0.848167	0.828611	NA	NA	NA	33
Cross-validated	LIHC	Age	0.563522	0.708058	0.715292	0.559794	0.715292	0.727166	0.712374	NA	NA	NA	57
Cross-validated	LUAD	Age	0.433417	0.519667	0.5005	0.566	0.5045	0.5525	0.511333	NA	NA	NA	37
Cross-validated	OV	Age	0.467489	0.678938	0.683427	0.525291	0.683427	0.692341	0.647046	NA	NA	NA	87
Cross-validated	PAAD	Age	0.536333	0.595944	0.597611	0.693944	0.597611	0.600944	0.540944	NA	NA	NA	35
Cross-validated	PCPG	Age	0.699327	0.73293	0.732948	0.741674	0.732948	0.739284	0.73862	NA	NA	NA	97
Cross-validated	PRAD	Age	0.601762	0.651414	0.652592	0.599041	0.652592	0.663751	0.653952	NA	NA	NA	305
Cross-validated	SARC	Age	0.759406	0.78557	0.790064	0.801403	0.790064	0.772402	0.788137	NA	NA	NA	149
Cross-validated	SKCM	Age	0.621683	0.591462	0.591462	0.417065	0.591462	0.591462	0.616841	NA	NA	NA	82
Cross-validated	STAD	Age	0.597894	0.667761	0.667356	0.614907	0.667771	0.662604	0.66736	NA	NA	NA	176
Cross-validated	TGCT	Age	0.665188	0.560397	0.560397	0.604084	0.560397	0.560397	0.558528	NA	NA	NA	78
Cross-validated	THCA	Age	0.672661	0.763817	0.765575	0.695685	0.765575	0.769797	0.772044	NA	NA	NA	287
Cross-validated	THYM	Age	0.716464	0.739686	0.739511	0.675552	0.739511	0.71206	0.724384	NA	NA	NA	76
Cross-validated	UCEC	Age	0.59	0.535	0.66	0.331667	0.661667	0.7	0.623333	NA	NA	NA	22
Cross-validated	UCS	Age	0.512083	0.337333	0.370667	NA	0.354	0.354	0.383889	NA	NA	NA	35
Cross-validated	UVM	Age	0.621167	0.690583	0.690583	NA	0.690583	0.690583	0.63775	NA	NA	NA	40
Cross-validated	Median	Age	0.606953	0.68158	0.685596	0.618114	0.685596	0.689167	0.684892	NA	NA	NA	NA
Cross-validated	Subset median	Age	0.613061	0.678152	0.675391	0.618114	0.675599	0.686107	0.684892	NA	NA	NA	NA
Cross-validated	Overall median	Age	0.606953	0.68158	0.685596	0.601563	0.685596	0.689167	0.684892	NA	NA	NA	NA
The "Subset median" AUC is the median AUC calculated only over the tissues where Alexandrov et al. found an age signature.
To calculate the "Overall median" AUC, whenever Alexandrov et al. methodology was not able to detect the age signature in a tissue, and therefore its intensities were not provided (NA), a 0.5 AUC was assigned to that signature for that tissue for their methodology.

## Sheet: Other Exposures CV (5%)
type	tissue	factor	Best_NMF	LDA	Logit	Matched_NMF	NNLS_Logit_betas	NNLS_Logit_means	RF	Signature1	SinglePeak	Unsupervised	n
Cross-validated	ESCA	Alcohol	0.474444	0.447778	0.437222	NA	0.480556	0.47	0.4225	NA	NA	NA	30
Cross-validated	HNSCC	Alcohol	0.511754	0.387865	0.612135	NA	0.5	0.5	0.617365	NA	NA	NA	45
Cross-validated	LIHC	Alcohol	0.608555	0.599759	0.609825	NA	0.610614	0.606884	0.639813	NA	NA	NA	154
Cross-validated	BLCA	Aristolochic Acid	0.888797	0.973075	0.983185	0.926868	0.98381	0.993185	0.992116	NA	NA	NA	104
Cross-validated	MESO	Asbestos	0.953472	0.983889	0.989	NA	0.989	0.987788	0.953818	NA	NA	NA	62
Cross-validated	BRCA	BRCA1/2 Mutation	0.695519	0.808024	0.802273	0.702179	0.802273	0.780266	0.787628	NA	NA	NA	727
Cross-validated	OV	BRCA1/2 Mutation	0.814664	0.746	0.746402	0.766508	0.746402	0.756459	0.768795	NA	NA	NA	157
Cross-validated	LIHC	Hepatitis B	0.489747	0.54849	0.528679	NA	0.538584	0.539379	0.540988	NA	NA	NA	163
Cross-validated	LIHC	Hepatitis C	0.496404	0.598276	0.593835	NA	0.593648	0.598391	0.611201	NA	NA	NA	119
Cross-validated	CESC	High Apobec	0.631404	0.549659	0.55885	0.615257	0.565236	0.625432	0.592391	NA	NA	NA	116
Cross-validated	KIRC	High Apobec	0.531962	0.531184	0.528894	NA	0.53253	0.527131	0.51289	NA	NA	NA	197
Cross-validated	GBM	IDH Methylated	0.785424	0.71086	0.688502	NA	0.675335	0.546904	0.681601	NA	NA	NA	249
Cross-validated	LGG	IDH Methylated	0.775001	0.71091	0.709285	NA	0.709268	0.569988	0.695623	NA	NA	NA	446
Cross-validated	GBM	MGMT Methylated	0.646054	0.759111	0.760063	NA	0.760063	0.760882	0.745915	NA	NA	NA	232
Cross-validated	LGG	MGMT Methylated	0.73492	0.75273	0.753267	NA	0.753267	0.743101	0.748766	NA	NA	NA	89
Cross-validated	COAD	MSI	0.965184	0.984389	0.980271	0.951518	0.980271	0.972888	0.976178	NA	NA	NA	222
Cross-validated	STAD	MSI	0.925445	0.98709	0.969116	0.995494	0.973286	0.997265	0.987828	NA	NA	NA	336
Cross-validated	UCEC	MSI	0.939351	0.99591	0.996722	0.980038	0.996722	0.99619	0.997114	NA	NA	NA	120
Cross-validated	COAD	Obesity	0.50572	0.534718	0.534718	NA	0.534718	0.534718	0.534947	NA	NA	NA	249
Cross-validated	ESCA	Obesity	0.637595	0.563075	0.590868	NA	0.562284	0.61163	0.707649	NA	NA	NA	57
Cross-validated	KIRP	Obesity	0.658173	0.639711	0.700622	NA	0.701483	0.756524	0.747598	NA	NA	NA	71
Cross-validated	UCEC	Obesity	0.529086	0.415895	0.584105	NA	0.5	0.492368	0.597422	NA	NA	NA	233
Cross-validated	STAD	POLD Mutation	0.932644	0.965056	0.978775	NA	0.974672	0.999442	0.994171	NA	NA	NA	301
Cross-validated	UCEC	POLD Mutation	0.937857	0.945397	0.969206	NA	0.973968	0.973968	0.974762	NA	NA	NA	50
Cross-validated	BRCA	POLe Mutation	0.670592	0.670078	0.670727	0.590907	0.670727	0.673831	0.68153	NA	NA	NA	719
Cross-validated	COAD	POLe Mutation	0.770707	0.971453	1	0.734493	1	1	0.999789	NA	NA	NA	211
Cross-validated	STAD	POLe Mutation	0.865116	0.981888	0.996778	NA	0.996778	0.989141	0.989405	NA	NA	NA	307
Cross-validated	UCEC	POLe Mutation	0.774876	0.976948	0.976948	0.734103	0.976948	0.976948	0.992223	NA	NA	NA	71
Cross-validated	BLCA	Smoking	0.603199	0.673028	0.672693	0.660641	0.672693	0.686338	0.678458	NA	NA	NA	288
Cross-validated	CESC	Smoking	0.541384	0.471271	0.528729	NA	0.5	0.5	0.528971	NA	NA	NA	217
Cross-validated	ESCAD	Smoking	0.593889	0.552623	0.563706	NA	0.593361	0.616	0.537595	NA	NA	NA	58
Cross-validated	ESCSQ	Smoking	0.467943	0.544557	0.42553	0.528046	0.485043	0.485043	0.441785	NA	NA	NA	82
Cross-validated	HNSCC	Smoking	0.757465	0.784659	0.803107	0.727081	0.803107	0.801417	0.81143	NA	NA	NA	354
Cross-validated	KIRP	Smoking	0.478809	0.538024	0.560324	0.524659	0.560324	0.518524	0.554783	NA	NA	NA	100
Cross-validated	LUAD	Smoking	0.854045	0.906767	0.908609	0.890828	0.908609	0.907888	0.906661	NA	NA	NA	375
Cross-validated	PAAD	Smoking	0.573331	0.4992	0.47628	NA	0.48774	0.48774	0.475133	NA	NA	NA	113
Cross-validated	SKCM	UV	0.922552	0.94624	0.944486	0.8894	0.94274	0.963731	0.959947	NA	NA	NA	374
Cross-validated	Median	NA	0.670592	0.71086	0.700622	0.734298	0.701483	0.686338	0.707649	NA	NA	NA	NA
Cross-validated	Subset median	NA	0.772791	0.857395	0.855858	0.734298	0.855858	0.854653	0.859045	NA	NA	NA	NA
Cross-validated	Subset smoking median	Smoking	0.603199	0.673028	0.672693	0.660641	0.672693	0.686338	0.678458	NA	NA	NA	NA
Cross-validated	Overall smoking median	Smoking	0.58361	0.54859	0.562015	0.526353	0.576843	0.567262	0.546189	NA	NA	NA	NA
The "Subset median" AUC is the median AUC calculated only over the tissues where Alexandrov et al. found a signature for the given exposure.
The "Subset smoking median" was instead calculated by restricting the set of tissues to those where Alexandrov et al. detected smoking signatures.
To calculate the "Overall smoking median" AUC, whenever Alexandrov et al. methodology was not able to detect a smoking signature in a tissue, and therefore its intensities were not provided (NA), a 0.5 AUC was assigned for their methodology to the smoking signature for that tissue.

## Sheet: Age Apparent (10%)
type	tissue	factor	Best_NMF	LDA	Logit	Matched_NMF	NNLS_Logit_betas	NNLS_Logit_means	RF	Signature1	SinglePeak	Unsupervised	n
Apparent	ACC	Age	0.535652	0.778261	0.778261	NA	0.778261	0.733043	0.776522	0.471304	0.74	NA	48
Apparent	BLCA	Age	0.635629	0.721301	0.721301	0.495748	0.721301	0.721301	0.726403	0.654337	0.624787	0.654337	97
Apparent	BRCA	Age	0.598032	0.611665	0.611665	0.585342	0.611665	0.611665	0.611677	0.55519	0.568081	0.604666	412
Apparent	CESC	Age	0.643928	0.717313	0.743152	0.643928	0.743152	0.724548	0.745478	0.568734	0.614729	0.568734	88
Apparent	CHOL	Age	0.491124	0.766272	0.766272	NA	0.766272	0.766272	0.733728	0.553254	0.627219	NA	26
Apparent	COAD	Age	0.587669	0.616155	0.616155	0.582726	0.616155	0.616155	0.623439	0.590531	0.684053	0.590531	124
Apparent	ESCAD	Age	0.573407	0.65928	0.65651	0.548476	0.65651	0.628809	0.67036	0.573407	0.51662	0.573407	38
Apparent	ESCSQ	Age	0.586895	0.645299	0.643875	0.586895	0.643875	0.61396	0.682336	0.575499	0.487179	0.575499	53
Apparent	GBM	Age	0.677778	0.703571	0.703571	0.629365	0.703571	0.70172	0.687698	0.612302	0.682672	0.612302	123
Apparent	HNSCC	Age	0.718116	0.784107	0.786052	0.636288	0.786052	0.751598	0.813281	0.671159	0.745763	0.671159	120
Apparent	KICH	Age	0.82872	0.818339	0.83218	0.541522	0.83218	0.83218	0.887543	0.709343	0.858131	0.761246	34
Apparent	KIRC	Age	0.641552	0.819783	0.819518	0.563427	0.819518	0.75437	0.797272	0.551112	0.771716	0.724311	123
Apparent	KIRP	Age	0.695157	0.757835	0.760684	0.695157	0.760684	0.74359	0.788462	0.494302	0.717949	0.705128	53
Apparent	LAML	Age	0.419271	0.661458	0.661458	0.419271	0.661458	0.661458	0.661458	0.585069	0.615451	0.635417	48
Apparent	LGG	Age	0.759259	0.918519	0.903704	0.85	0.903704	0.851852	0.881481	0.792593	0.877778	0.944444	33
Apparent	LIHC	Age	0.571429	0.746305	0.754926	0.594828	0.754926	0.736453	0.755542	0.549261	0.674261	0.674877	57
Apparent	LUAD	Age	0.657407	0.557099	0.557099	0.484568	0.580247	0.584877	0.634259	0.45679	0.574074	0.45679	37
Apparent	OV	Age	0.528102	0.731707	0.729056	0.511135	0.729056	0.720042	0.739926	0.671792	0.540032	0.671792	87
Apparent	PAAD	Age	0.649123	0.684211	0.636842	0.549123	0.636842	0.636842	0.647368	0.638596	0.533333	0.638596	35
Apparent	PCPG	Age	0.704294	0.731505	0.731505	0.742772	0.731505	0.731505	0.737457	0.523384	0.778274	0.753401	97
Apparent	PRAD	Age	0.606968	0.667505	0.667247	0.606968	0.667247	0.663333	0.673677	0.560452	0.691785	0.608925	305
Apparent	SARC	Age	0.749189	0.801099	0.817592	0.798486	0.817592	0.783886	0.827776	0.692682	0.79398	0.805876	149
Apparent	SKCM	Age	0.627603	0.621356	0.621356	0.39649	0.621356	0.621356	0.689173	0.483046	0.533908	0.483046	82
Apparent	STAD	Age	0.658204	0.683721	0.683721	0.658204	0.683721	0.647158	0.707881	0.612726	0.604974	0.612726	176
Apparent	TGCT	Age	0.692763	0.623684	0.625658	0.601974	0.625658	0.609211	0.617434	0.432895	0.6	0.613158	78
Apparent	THCA	Age	0.656948	0.771356	0.770821	0.664942	0.770821	0.768197	0.786783	0.518149	0.745311	0.774514	287
Apparent	THYM	Age	0.727651	0.748787	0.739085	0.684685	0.739085	0.759182	0.768538	0.595981	0.710672	0.718642	76
Apparent	UCEC	Age	0.702479	0.747934	0.747934	0.446281	0.747934	0.756198	0.731405	0.661157	0.578512	0.561983	22
Apparent	UCS	Age	0.584967	0.568627	0.568627	NA	0.568627	0.568627	0.568627	0.633987	0.609477	NA	35
Apparent	UVM	Age	0.675	0.69375	0.69375	NA	0.69375	0.69375	0.70125	0.29	0.58625	NA	40
Apparent	Median	Age	0.646525	0.719307	0.725179	0.590861	0.725179	0.720672	0.728904	0.574453	0.626003	0.637007	NA
Apparent	Subset median	Age	0.653036	0.719307	0.725179	0.590861	0.725179	0.720672	0.728904	0.580284	0.649524	0.637007	NA
Apparent	Overall median	Age	0.646525	0.719307	0.725179	0.584034	0.725179	0.720672	0.728904	0.574453	0.626003	0.612942	NA
The "Subset median" AUC is the median AUC calculated only over the tissues where Alexandrov et al. found an age signature.
To calculate the "Overall median" AUC, whenever Alexandrov et al. methodology was not able to detect the age signature in a tissue, and therefore its intensities were not provided (NA), a 0.5 AUC was assigned to that signature for that tissue for their methodology.

## Sheet: Other Exposures Apparent (10%)
type	tissue	factor	Best_NMF	LDA	Logit	Matched_NMF	NNLS_Logit_betas	NNLS_Logit_means	RF	Signature1	SinglePeak	Unsupervised	n
Apparent	ESCA	Alcohol	0.643519	0.634259	0.634259	NA	0.5	0.5	0.726852	NA	NA	NA	30
Apparent	HNSCC	Alcohol	0.589862	0.25576	0.74424	NA	0.5	0.5	0.75576	NA	NA	NA	45
Apparent	LIHC	Alcohol	0.60365	0.665203	0.663998	NA	0.663998	0.655906	0.70928	NA	NA	NA	154
Apparent	BLCA	Aristolochic Acid	0.854799	0.99226	0.99226	0.854799	0.99226	0.99226	0.996285	NA	NA	0.964396	104
Apparent	MESO	Asbestos	0.9375	0.9875	0.993182	NA	0.993182	0.985227	0.9875	NA	NA	NA	62
Apparent	BRCA	BRCA1/2 Mutation	0.716408	0.806741	0.834941	0.666518	0.834941	0.822191	0.852197	NA	NA	0.670274	727
Apparent	OV	BRCA1/2 Mutation	0.812738	0.763921	0.757818	0.663616	0.757818	0.81312	0.837719	NA	NA	0.809687	157
Apparent	LIHC	Hepatitis B	0.560758	0.529242	0.470758	NA	0.5	0.5	0.565	NA	NA	NA	163
Apparent	LIHC	Hepatitis C	0.635081	0.701613	0.701613	NA	0.701613	0.683284	0.746884	NA	NA	NA	119
Apparent	CESC	High Apobec	0.658824	0.648869	0.690498	0.611765	0.690799	0.634691	0.685219	NA	NA	0.638612	116
Apparent	KIRC	High Apobec	0.530708	0.555756	0.557683	NA	0.557683	0.577192	0.617775	NA	NA	NA	197
Apparent	GBM	IDH Methylated	0.802843	0.678782	0.683879	NA	0.683611	0.688171	0.655311	NA	NA	NA	249
Apparent	LGG	IDH Methylated	0.787587	0.728917	0.729435	NA	0.729435	0.587193	0.733781	NA	NA	NA	446
Apparent	GBM	MGMT Methylated	0.660323	0.764601	0.764601	NA	0.764601	0.764601	0.77226	NA	NA	NA	232
Apparent	LGG	MGMT Methylated	0.700216	0.759199	0.75974	NA	0.75974	0.767857	0.7546	NA	NA	NA	89
Apparent	COAD	MSI	0.941121	0.987654	0.988414	0.968661	0.988414	0.986895	0.982336	NA	NA	0.967047	222
Apparent	STAD	MSI	0.933666	0.994867	0.990701	0.999928	0.990701	0.998438	0.994606	NA	NA	0.999855	336
Apparent	UCEC	MSI	0.945767	0.991733	0.99537	0.98578	0.99537	0.999669	1	NA	NA	1	120
Apparent	COAD	Obesity	0.541831	0.586249	0.586249	NA	0.586249	0.586249	0.603628	NA	NA	NA	249
Apparent	ESCA	Obesity	0.616379	0.752463	0.748768	NA	0.686576	0.71798	0.869458	NA	NA	NA	57
Apparent	KIRP	Obesity	0.75	0.722581	0.758065	NA	0.758065	0.808065	0.816532	NA	NA	NA	71
Apparent	UCEC	Obesity	0.611746	0.384729	0.615271	NA	0.5	0.5	0.684151	NA	NA	NA	233
Apparent	STAD	POLD Mutation	0.936031	0.998924	1	NA	1	0.999731	0.987628	NA	NA	NA	301
Apparent	UCEC	POLD Mutation	0.90377	0.89881	0.918651	NA	0.919643	0.998016	0.998016	NA	NA	NA	50
Apparent	BRCA	POLe Mutation	0.664796	0.679105	0.679105	0.530181	0.679105	0.679105	0.686579	NA	NA	0.423295	719
Apparent	COAD	POLe Mutation	0.875	0.974679	0.999359	0.728686	0.999359	0.999038	0.999519	NA	NA	0.722756	211
Apparent	STAD	POLe Mutation	0.945815	0.980125	0.999448	NA	0.999448	0.992455	0.996872	NA	NA	NA	307
Apparent	UCEC	POLe Mutation	0.838889	0.97381	0.97381	0.714286	0.97381	0.97381	1	NA	NA	0.734127	71
Apparent	BLCA	Smoking	0.673109	0.702347	0.701768	0.673109	0.701768	0.690582	0.723211	NA	0.64022	0.683918	288
Apparent	CESC	Smoking	0.560538	0.427007	0.572993	NA	0.5	0.5	0.584261	NA	0.428102	NA	217
Apparent	ESCAD	Smoking	0.654037	0.645963	0.648447	NA	0.64472	0.63354	0.652174	NA	0.582609	NA	58
Apparent	ESCSQ	Smoking	0.572544	0.450553	0.549447	0.405986	0.5	0.5	0.618738	NA	0.52635	0.470072	82
Apparent	HNSCC	Smoking	0.759569	0.806565	0.800024	0.765181	0.800004	0.79308	0.832768	NA	0.695333	0.818213	354
Apparent	KIRP	Smoking	0.675967	0.635417	0.635417	0.520461	0.635417	0.635417	0.646949	NA	0.608259	0.625744	100
Apparent	LUAD	Smoking	0.878668	0.912865	0.912865	0.886447	0.912865	0.912865	0.930369	NA	0.90981	0.910619	375
Apparent	PAAD	Smoking	0.59456	0.591872	0.591872	NA	0.591872	0.591872	0.601992	NA	0.548545	NA	113
Apparent	SKCM	UV	0.905003	0.962677	0.958333	0.825028	0.958207	0.961768	0.965126	NA	NA	0.949633	374
Apparent	Median	NA	0.700216	0.728917	0.748768	0.721486	0.729435	0.71798	0.75576	NA	0.595434	0.771907	NA
Apparent	Subset median	NA	0.825814	0.859803	0.873903	0.721486	0.873903	0.867528	0.891283	NA	NA	0.771907	NA
Apparent	Subset smoking median	Smoking	0.675967	0.702347	0.701768	0.673109	0.701768	0.690582	0.723211	NA	0.64022	0.683918	NA
Apparent	Overall smoking median	Smoking	0.663573	0.64069	0.641932	0.510231	0.591872	0.591872	0.618738	NA	0.548545	0.562872	NA
The "Subset median" AUC is the median AUC calculated only over the tissues where Alexandrov et al. found a signature for the given exposure.
The "Subset smoking median" was instead calculated by restricting the set of tissues to those where Alexandrov et al. detected smoking signatures.
To calculate the "Overall smoking median" AUC, whenever Alexandrov et al. methodology was not able to detect a smoking signature in a tissue, and therefore its intensities were not provided (NA), a 0.5 AUC was assigned for their methodology to the smoking signature for that tissue.

## Sheet: Age CV (10%)
type	tissue	factor	Best_NMF	LDA	Logit	Matched_NMF	NNLS_Logit_betas	NNLS_Logit_means	RF	Signature1	SinglePeak	Unsupervised	n
Cross-validated	ACC	Age	0.570356	0.716908	0.713152	NA	0.711819	0.702302	0.713654	NA	NA	NA	48
Cross-validated	BLCA	Age	0.617227	0.728969	0.730826	0.521901	0.730826	0.67317	0.731682	NA	NA	NA	97
Cross-validated	BRCA	Age	0.613633	0.611305	0.611305	0.579772	0.611305	0.611305	0.60878	NA	NA	NA	412
Cross-validated	CESC	Age	0.713503	0.684104	0.708659	0.663284	0.708659	0.705178	0.701882	NA	NA	NA	88
Cross-validated	CHOL	Age	0.564333	0.75	0.78	NA	0.78	0.786667	0.666667	NA	NA	NA	26
Cross-validated	COAD	Age	0.553904	0.536497	0.536497	0.63049	0.536497	0.536497	0.538292	NA	NA	NA	124
Cross-validated	ESCAD	Age	0.483917	0.547833	0.552083	0.522	0.552083	0.529583	0.451972	NA	NA	NA	38
Cross-validated	ESCSQ	Age	0.470829	0.509629	0.5152	0.504838	0.516033	0.558067	0.510348	NA	NA	NA	53
Cross-validated	GBM	Age	0.638431	0.691498	0.699156	0.62466	0.699156	0.699681	0.711296	NA	NA	NA	123
Cross-validated	HNSCC	Age	0.697154	0.687666	0.686856	0.651924	0.687497	0.702007	0.709892	NA	NA	NA	120
Cross-validated	KICH	Age	0.825	0.779722	0.779722	0.659778	0.779722	0.805056	0.797	NA	NA	NA	34
Cross-validated	KIRC	Age	0.696261	0.781411	0.781388	0.644075	0.781388	0.75231	0.73801	NA	NA	NA	123
Cross-validated	KIRP	Age	0.745476	0.752571	0.750971	0.721	0.750971	0.7542	0.746976	NA	NA	NA	53
Cross-validated	LAML	Age	0.5731	0.570689	0.583156	0.5731	0.576956	0.539333	0.566111	NA	NA	NA	48
Cross-validated	LGG	Age	0.719556	0.889944	0.861778	0.849333	0.861778	0.836778	0.871056	NA	NA	NA	33
Cross-validated	LIHC	Age	0.600629	0.748242	0.727754	0.571641	0.727754	0.738377	0.718619	NA	NA	NA	57
Cross-validated	LUAD	Age	0.454833	0.478667	0.511	0.574833	0.514333	0.474833	0.53275	NA	NA	NA	37
Cross-validated	OV	Age	0.550788	0.681804	0.692335	0.507789	0.691835	0.662074	0.667042	NA	NA	NA	87
Cross-validated	PAAD	Age	0.633083	0.586389	0.613889	0.62525	0.613889	0.608889	0.611361	NA	NA	NA	35
Cross-validated	PCPG	Age	0.685781	0.746424	0.746424	0.739916	0.746424	0.746424	0.739754	NA	NA	NA	97
Cross-validated	PRAD	Age	0.600056	0.650199	0.648471	0.599573	0.648471	0.653271	0.642477	NA	NA	NA	305
Cross-validated	SARC	Age	0.754399	0.789072	0.786314	0.79465	0.786314	0.778658	0.787634	NA	NA	NA	149
Cross-validated	SKCM	Age	0.635406	0.59454	0.59454	0.424348	0.59454	0.59454	0.614193	NA	NA	NA	82
Cross-validated	STAD	Age	0.57877	0.658838	0.662861	0.605931	0.663184	0.6229	0.652125	NA	NA	NA	176
Cross-validated	TGCT	Age	0.627265	0.579356	0.580478	0.6087	0.580478	0.592208	0.559621	NA	NA	NA	78
Cross-validated	THCA	Age	0.665485	0.76382	0.762977	0.672801	0.762977	0.768012	0.772504	NA	NA	NA	287
Cross-validated	THYM	Age	0.710786	0.729815	0.734711	0.666929	0.734711	0.75494	0.730658	NA	NA	NA	76
Cross-validated	UCEC	Age	0.561111	0.546111	0.701111	0.361111	0.701111	0.691111	0.622778	NA	NA	NA	22
Cross-validated	UCS	Age	0.51225	0.412167	0.409667	NA	0.410917	0.410917	0.359389	NA	NA	NA	35
Cross-validated	UVM	Age	0.616159	0.671651	0.671651	NA	0.671651	0.671651	0.597873	NA	NA	NA	40
Cross-validated	Median	Age	0.616693	0.682954	0.695745	0.61668	0.695495	0.68214	0.666855	NA	NA	NA	NA
Cross-validated	Subset median	Age	0.630174	0.682954	0.695745	0.61668	0.695495	0.68214	0.684462	NA	NA	NA	NA
Cross-validated	Overall median	Age	0.616693	0.682954	0.695745	0.602752	0.695495	0.68214	0.666855	NA	NA	NA	NA
The "Subset median" AUC is the median AUC calculated only over the tissues where Alexandrov et al. found an age signature.
To calculate the "Overall median" AUC, whenever Alexandrov et al. methodology was not able to detect the age signature in a tissue, and therefore its intensities were not provided (NA), a 0.5 AUC was assigned to that signature for that tissue for their methodology.

## Sheet: Other Exposures CV (10%)
type	tissue	factor	Best_NMF	LDA	Logit	Matched_NMF	NNLS_Logit_betas	NNLS_Logit_means	RF	Signature1	SinglePeak	Unsupervised	n
Cross-validated	ESCA	Alcohol	0.478833	0.475833	0.374611	NA	0.475222	0.480222	0.407667	NA	NA	NA	30
Cross-validated	HNSCC	Alcohol	0.532292	0.377778	0.622222	NA	0.5	0.5	0.611752	NA	NA	NA	45
Cross-validated	LIHC	Alcohol	0.581685	0.597126	0.601251	NA	0.601251	0.595525	0.609808	NA	NA	NA	154
Cross-validated	BLCA	Aristolochic Acid	0.914608	0.907472	0.901662	0.956722	0.932076	0.984493	0.991817	NA	NA	NA	104
Cross-validated	MESO	Asbestos	0.948675	0.985306	0.986008	NA	0.986008	0.979673	0.977254	NA	NA	NA	62
Cross-validated	BRCA	BRCA1/2 Mutation	0.686198	0.79471	0.799118	0.716718	0.799097	0.79223	0.79754	NA	NA	NA	727
Cross-validated	OV	BRCA1/2 Mutation	0.806284	0.656057	0.653778	0.748322	0.65455	0.665471	0.646829	NA	NA	NA	157
Cross-validated	LIHC	Hepatitis B	0.535276	0.536698	0.47966	NA	0.508179	0.506853	0.487953	NA	NA	NA	163
Cross-validated	LIHC	Hepatitis C	0.54283	0.579555	0.583199	NA	0.583953	0.58961	0.570692	NA	NA	NA	119
Cross-validated	CESC	High Apobec	0.610862	0.577527	0.596785	0.61705	0.596474	0.617364	0.588583	NA	NA	NA	116
Cross-validated	KIRC	High Apobec	0.519507	0.541952	0.539434	NA	0.539434	0.543721	0.541523	NA	NA	NA	197
Cross-validated	GBM	IDH Methylated	0.733634	0.659699	0.660056	NA	0.659106	0.640326	0.633209	NA	NA	NA	249
Cross-validated	LGG	IDH Methylated	0.77876	0.710242	0.70955	NA	0.709669	0.561801	0.704854	NA	NA	NA	446
Cross-validated	GBM	MGMT Methylated	0.679488	0.759124	0.758799	NA	0.758799	0.759175	0.746955	NA	NA	NA	232
Cross-validated	LGG	MGMT Methylated	0.72121	0.746372	0.746856	NA	0.746856	0.747198	0.744414	NA	NA	NA	89
Cross-validated	COAD	MSI	0.970676	0.957641	0.945297	0.93406	0.945297	0.955406	0.948499	NA	NA	NA	222
Cross-validated	STAD	MSI	0.943301	0.98999	0.988033	0.997602	0.988819	0.995411	0.989721	NA	NA	NA	336
Cross-validated	UCEC	MSI	0.93769	0.982449	0.984815	0.977785	0.984815	0.996761	0.995831	NA	NA	NA	120
Cross-validated	COAD	Obesity	0.51493	0.557711	0.557711	NA	0.557711	0.557711	0.545652	NA	NA	NA	249
Cross-validated	ESCA	Obesity	0.680635	0.581556	0.57754	NA	0.580095	0.633952	0.638619	NA	NA	NA	57
Cross-validated	KIRP	Obesity	0.674189	0.720825	0.761572	NA	0.761572	0.805742	0.762814	NA	NA	NA	71
Cross-validated	UCEC	Obesity	0.570687	0.501056	0.548931	NA	0.524993	0.524993	0.557073	NA	NA	NA	233
Cross-validated	STAD	POLD Mutation	0.878372	0.972844	0.976165	NA	0.976165	0.991622	0.971847	NA	NA	NA	301
Cross-validated	UCEC	POLD Mutation	0.866071	0.828249	0.838418	NA	0.851811	0.975818	0.96844	NA	NA	NA	50
Cross-validated	BRCA	POLe Mutation	0.675867	0.598255	0.598255	0.600237	0.598255	0.598255	0.583784	NA	NA	NA	719
Cross-validated	COAD	POLe Mutation	0.876365	0.980644	0.998196	0.729274	0.998196	0.99767	0.990924	NA	NA	NA	211
Cross-validated	STAD	POLe Mutation	0.936097	0.96667	0.994351	NA	0.994351	0.987723	0.991978	NA	NA	NA	307
Cross-validated	UCEC	POLe Mutation	0.774514	0.989226	0.984736	0.715397	0.984736	0.984736	0.991548	NA	NA	NA	71
Cross-validated	BLCA	Smoking	0.586776	0.649965	0.637506	0.657657	0.637388	0.656425	0.668581	NA	NA	NA	288
Cross-validated	CESC	Smoking	0.565831	0.45318	0.54682	NA	0.5	0.5	0.544905	NA	NA	NA	217
Cross-validated	ESCAD	Smoking	0.631946	0.528792	0.533982	NA	0.53975	0.596149	0.546377	NA	NA	NA	58
Cross-validated	ESCSQ	Smoking	0.503627	0.489127	0.498565	0.523958	0.493846	0.493846	0.498729	NA	NA	NA	82
Cross-validated	HNSCC	Smoking	0.763219	0.783858	0.790842	0.739864	0.790667	0.799365	0.812405	NA	NA	NA	354
Cross-validated	KIRP	Smoking	0.40578	0.50806	0.477516	0.497269	0.497396	0.491906	0.467491	NA	NA	NA	100
Cross-validated	LUAD	Smoking	0.835453	0.904646	0.904523	0.891999	0.904523	0.905526	0.90387	NA	NA	NA	375
Cross-validated	PAAD	Smoking	0.516007	0.523496	0.496414	NA	0.509955	0.509955	0.494023	NA	NA	NA	113
Cross-validated	SKCM	UV	0.910978	0.939671	0.940843	0.895905	0.941289	0.962373	0.960107	NA	NA	NA	374
Cross-validated	Median	NA	0.680635	0.659699	0.660056	0.734569	0.659106	0.656425	0.668581	NA	NA	NA	NA
Cross-validated	Subset median	NA	0.790399	0.849678	0.85039	0.734569	0.85181	0.852445	0.858137	NA	NA	NA	NA
Cross-validated	Subset smoking median	Smoking	0.586776	0.649965	0.637506	0.657657	0.637388	0.656425	0.668581	NA	NA	NA	NA
Cross-validated	Overall smoking median	Smoking	0.576303	0.526144	0.540401	0.511979	0.524852	0.553052	0.545641	NA	NA	NA	NA
The "Subset median" AUC is the median AUC calculated only over the tissues where Alexandrov et al. found a signature for the given exposure.
The "Subset smoking median" was instead calculated by restricting the set of tissues to those where Alexandrov et al. detected smoking signatures.
To calculate the "Overall smoking median" AUC, whenever Alexandrov et al. methodology was not able to detect a smoking signature in a tissue, and therefore its intensities were not provided (NA), a 0.5 AUC was assigned for their methodology to the smoking signature for that tissue.

## Sheet: Age Apparent (20%)
type	tissue	factor	Best_NMF	LDA	Logit	Matched_NMF	NNLS_Logit_betas	NNLS_Logit_means	RF	Signature1	SinglePeak	Unsupervised	n
Apparent	ACC	Age	0.610435	0.746957	0.746957	NA	0.746957	0.743478	0.778261	0.471304	0.74	NA	48
Apparent	BLCA	Age	0.58716	0.729379	0.723427	0.48682	0.723427	0.677934	0.766582	0.654337	0.624787	0.654337	97
Apparent	BRCA	Age	0.587864	0.611665	0.611665	0.556946	0.611665	0.611665	0.611677	0.55519	0.568081	0.604666	412
Apparent	CESC	Age	0.626873	0.721189	0.750129	0.712145	0.750129	0.74186	0.710078	0.568734	0.614729	0.568734	88
Apparent	CHOL	Age	0.491124	0.609467	0.609467	NA	0.609467	0.609467	0.692308	0.553254	0.627219	NA	26
Apparent	COAD	Age	0.562955	0.576093	0.576093	0.636707	0.576093	0.576093	0.575312	0.590531	0.684053	0.590531	124
Apparent	ESCAD	Age	0.549861	0.641274	0.641274	0.601108	0.641274	0.641274	0.641274	0.573407	0.51662	0.573407	38
Apparent	ESCSQ	Age	0.605413	0.639601	0.639601	0.605413	0.639601	0.619658	0.671652	0.575499	0.487179	0.575499	53
Apparent	GBM	Age	0.677778	0.714418	0.714418	0.629365	0.714418	0.710979	0.695503	0.612302	0.682672	0.612302	123
Apparent	HNSCC	Age	0.726313	0.695749	0.727563	0.612948	0.727563	0.762017	0.713393	0.671159	0.745763	0.671159	120
Apparent	KICH	Age	0.82526	0.83218	0.83218	0.541522	0.83218	0.83218	0.806228	0.709343	0.858131	0.761246	34
Apparent	KIRC	Age	0.628972	0.802701	0.802701	0.576801	0.802701	0.763771	0.79661	0.551112	0.771716	0.724311	123
Apparent	KIRP	Age	0.695157	0.757835	0.75641	0.695157	0.75641	0.745014	0.784188	0.494302	0.717949	0.705128	53
Apparent	LAML	Age	0.706597	0.6875	0.6875	0.706597	0.6875	0.6875	0.6875	0.585069	0.615451	0.635417	48
Apparent	LGG	Age	0.759259	0.883333	0.883333	0.85	0.883333	0.883333	0.877778	0.792593	0.877778	0.944444	33
Apparent	LIHC	Age	0.578818	0.719828	0.717365	0.55665	0.717365	0.674261	0.71798	0.549261	0.674261	0.674877	57
Apparent	LUAD	Age	0.520062	0.618827	0.549383	0.520062	0.558642	0.574074	0.58179	0.45679	0.574074	0.45679	37
Apparent	OV	Age	0.527572	0.731707	0.731707	0.514316	0.731707	0.720042	0.746288	0.671792	0.540032	0.671792	87
Apparent	PAAD	Age	0.508772	0.677193	0.684211	0.559649	0.684211	0.698246	0.705263	0.638596	0.533333	0.638596	35
Apparent	PCPG	Age	0.704294	0.731505	0.731505	0.742772	0.731505	0.731505	0.732568	0.523384	0.778274	0.753401	97
Apparent	PRAD	Age	0.607054	0.650043	0.650043	0.607054	0.650043	0.650043	0.653355	0.560452	0.691785	0.608925	305
Apparent	SARC	Age	0.749189	0.779019	0.778479	0.798486	0.778479	0.776857	0.796593	0.692682	0.79398	0.805876	149
Apparent	SKCM	Age	0.636526	0.621356	0.621356	0.405413	0.621356	0.621356	0.635336	0.483046	0.533908	0.483046	82
Apparent	STAD	Age	0.622093	0.677519	0.677519	0.622093	0.677519	0.677519	0.678295	0.612726	0.604974	0.612726	176
Apparent	TGCT	Age	0.692763	0.594079	0.594079	0.601974	0.594079	0.604605	0.580592	0.432895	0.6	0.613158	78
Apparent	THCA	Age	0.656803	0.74395	0.74395	0.665087	0.74395	0.74395	0.752065	0.518149	0.745311	0.774514	287
Apparent	THYM	Age	0.727651	0.739085	0.738392	0.684685	0.738392	0.759182	0.739432	0.595981	0.710672	0.718642	76
Apparent	UCEC	Age	0.760331	0.743802	0.719008	0.380165	0.719008	0.735537	0.752066	0.661157	0.578512	0.561983	22
Apparent	UCS	Age	0.568627	0.568627	0.568627	NA	0.568627	0.568627	0.594771	0.633987	0.609477	NA	35
Apparent	UVM	Age	0.675	0.69375	0.69375	NA	0.69375	0.69375	0.725	0.29	0.58625	NA	40
Apparent	Median	Age	0.627923	0.705083	0.715891	0.606233	0.715891	0.695998	0.711735	0.574453	0.626003	0.637007	NA
Apparent	Subset median	Age	0.632749	0.717123	0.718186	0.606233	0.718186	0.704612	0.711735	0.580284	0.649524	0.637007	NA
Apparent	Overall median	Age	0.627923	0.705083	0.715891	0.601541	0.715891	0.695998	0.711735	0.574453	0.626003	0.612942	NA
The "Subset median" AUC is the median AUC calculated only over the tissues where Alexandrov et al. found an age signature.
To calculate the "Overall median" AUC, whenever Alexandrov et al. methodology was not able to detect the age signature in a tissue, and therefore its intensities were not provided (NA), a 0.5 AUC was assigned to that signature for that tissue for their methodology.

## Sheet: Other Exposures Apparent (20%)
type	tissue	factor	Best_NMF	LDA	Logit	Matched_NMF	NNLS_Logit_betas	NNLS_Logit_means	RF	Signature1	SinglePeak	Unsupervised	n
Apparent	ESCA	Alcohol	0.708333	0.516204	0.483796	NA	0.5	0.5	0.525463	NA	NA	NA	30
Apparent	HNSCC	Alcohol	0.475806	0.319124	0.680876	NA	0.5	0.5	0.701613	NA	NA	NA	45
Apparent	LIHC	Alcohol	0.621729	0.624397	0.624742	NA	0.624742	0.556043	0.595902	NA	NA	NA	154
Apparent	BLCA	Aristolochic Acid	0.906502	0.99226	0.99226	0.877399	0.99226	0.99226	0.988854	NA	NA	0.964396	104
Apparent	MESO	Asbestos	0.9375	0.947727	0.953409	NA	0.953409	0.995455	0.965341	NA	NA	NA	62
Apparent	BRCA	BRCA1/2 Mutation	0.680333	0.783258	0.783258	0.720737	0.783258	0.783258	0.780007	NA	NA	0.670274	727
Apparent	OV	BRCA1/2 Mutation	0.808924	0.719108	0.719108	0.671625	0.719108	0.719108	0.72807	NA	NA	0.809687	157
Apparent	LIHC	Hepatitis B	0.534773	0.496288	0.503712	NA	0.5	0.5	0.53	NA	NA	NA	163
Apparent	LIHC	Hepatitis C	0.589809	0.652126	0.652126	NA	0.652126	0.652126	0.659091	NA	NA	NA	119
Apparent	CESC	High Apobec	0.665913	0.634691	0.643137	0.621418	0.639668	0.641629	0.677225	NA	NA	0.638612	116
Apparent	KIRC	High Apobec	0.532033	0.583213	0.583213	NA	0.583213	0.583213	0.589957	NA	NA	NA	197
Apparent	GBM	IDH Methylated	0.717275	0.649812	0.649812	NA	0.649812	0.649812	0.664968	NA	NA	NA	249
Apparent	LGG	IDH Methylated	0.756286	0.640827	0.640827	NA	0.640827	0.640827	0.646691	NA	NA	NA	446
Apparent	GBM	MGMT Methylated	0.660787	0.766729	0.7658	NA	0.7658	0.768972	0.778758	NA	NA	NA	232
Apparent	LGG	MGMT Methylated	0.700758	0.762987	0.765152	NA	0.765152	0.765152	0.751894	NA	NA	NA	89
Apparent	COAD	MSI	0.977018	0.968661	0.97018	0.902944	0.97018	0.97018	0.969896	NA	NA	0.967047	222
Apparent	STAD	MSI	0.967593	0.997768	0.997619	0.994141	0.997619	0.997917	0.997694	NA	NA	0.999855	336
Apparent	UCEC	MSI	0.940807	0.998347	0.998347	0.99041	0.998347	0.998347	0.999008	NA	NA	1	120
Apparent	COAD	Obesity	0.567615	0.517265	0.517265	NA	0.517265	0.517265	0.526772	NA	NA	NA	249
Apparent	ESCA	Obesity	0.523399	0.722906	0.724138	NA	0.716749	0.567734	0.732143	NA	NA	NA	57
Apparent	KIRP	Obesity	0.745968	0.729839	0.751613	NA	0.751613	0.808065	0.817742	NA	NA	NA	71
Apparent	UCEC	Obesity	0.604766	0.641074	0.641074	NA	0.641074	0.641074	0.656726	NA	NA	NA	233
Apparent	STAD	POLD Mutation	0.847623	0.991393	0.993007	NA	0.993007	0.967994	0.988838	NA	NA	NA	301
Apparent	UCEC	POLD Mutation	0.906746	0.712302	0.886905	NA	0.892857	0.998016	0.980159	NA	NA	NA	50
Apparent	BRCA	POLe Mutation	0.64818	0.665794	0.665794	0.584659	0.665794	0.665794	0.657229	NA	NA	0.423295	719
Apparent	COAD	POLe Mutation	0.875	0.994872	0.986538	0.658333	0.986538	0.994551	1	NA	NA	0.722756	211
Apparent	STAD	POLe Mutation	0.954952	1	0.998528	NA	0.998528	0.998712	1	NA	NA	NA	307
Apparent	UCEC	POLe Mutation	0.844444	0.796032	0.974603	0.785714	0.978175	0.998413	0.999206	NA	NA	0.734127	71
Apparent	BLCA	Smoking	0.585511	0.62466	0.624312	0.672095	0.624022	0.623674	0.68328	NA	0.64022	0.683918	288
Apparent	CESC	Smoking	0.559398	0.433622	0.566378	NA	0.5	0.5	0.569982	NA	0.428102	NA	217
Apparent	ESCAD	Smoking	0.61118	0.632298	0.627329	NA	0.627329	0.636025	0.673913	NA	0.582609	NA	58
Apparent	ESCSQ	Smoking	0.612882	0.481783	0.518217	0.550748	0.5	0.5	0.539688	NA	0.52635	0.470072	82
Apparent	HNSCC	Smoking	0.749536	0.800993	0.802527	0.75541	0.802527	0.805919	0.833192	NA	0.695333	0.818213	354
Apparent	KIRP	Smoking	0.513021	0.56064	0.56064	0.513021	0.56064	0.56064	0.667411	NA	0.608259	0.625744	100
Apparent	LUAD	Smoking	0.860995	0.897454	0.897454	0.893704	0.897454	0.897454	0.916667	NA	0.90981	0.910619	375
Apparent	PAAD	Smoking	0.589817	0.593928	0.593928	NA	0.593928	0.593928	0.602467	NA	0.548545	NA	113
Apparent	SKCM	UV	0.893967	0.959874	0.940859	0.891876	0.94101	0.961263	0.964747	NA	NA	0.949633	374
Apparent	Median	NA	0.700758	0.712302	0.719108	0.738073	0.716749	0.665794	0.72807	NA	0.595434	0.771907	NA
Apparent	Subset median	NA	0.826684	0.798512	0.849991	0.738073	0.849991	0.851686	0.874929	NA	NA	0.771907	NA
Apparent	Subset smoking median	Smoking	0.612882	0.62466	0.624312	0.672095	0.624022	0.623674	0.68328	NA	0.64022	0.683918	NA
Apparent	Overall smoking median	Smoking	0.600498	0.609294	0.60912	0.531885	0.56064	0.56064	0.602467	NA	0.548545	0.562872	NA
The "Subset median" AUC is the median AUC calculated only over the tissues where Alexandrov et al. found a signature for the given exposure.
The "Subset smoking median" was instead calculated by restricting the set of tissues to those where Alexandrov et al. detected smoking signatures.
To calculate the "Overall smoking median" AUC, whenever Alexandrov et al. methodology was not able to detect a smoking signature in a tissue, and therefore its intensities were not provided (NA), a 0.5 AUC was assigned for their methodology to the smoking signature for that tissue.

[truncated: 6 more sheets: Age CV (20%), Other Exposures CV (20%), Age Apparent (25%), Other Exposures Apparent (25%), Age CV (25%), Other Exposures CV (25%)]
